# Supplementary material for: Dynamic Clinical Success Rates for Drugs in the 21st Century
Source: bioRxiv or medRxiv preprint supplement (doi:10.1101/2024.02.26.24303388), 2024-02-29
Supplement: Supplementary file [file media-1.pdf]

**Supplementary Information for:**

**Dynamic Clinical Success Rates for Drugs in the 21st Century**

Ying Zhou<sup>1,†</sup>, Yintao Zhang<sup>1,†</sup>, Zhen Chen<sup>1,†</sup>, Shijie Huang<sup>1</sup>, Yinghong Li<sup>1</sup>, Jianbo Fu<sup>2</sup>,  
Hongning Zhang<sup>1</sup>, Donghai Zhao<sup>1</sup>, Xichen Lian<sup>1</sup>, Yuan Zhou<sup>1</sup>, Xinyi Shen<sup>3</sup>, Yunqing Qiu<sup>1</sup>,  
Lianyi Han<sup>4</sup>, Feng Zhu<sup>1,\*</sup>

<sup>1</sup> College of Pharmaceutical Sciences, Zhejiang University, Hangzhou 310058, China.

<sup>2</sup> Centre for Clinical Research, Helmholtz Centre for Infection Research, Hannover 30625, Germany.

<sup>3</sup> Yale School of Public Health, Yale University, New Haven 06510, United States.

<sup>4</sup> Greater Bay Area Institute of Precision Medicine, Fudan University, Shanghai 315211, China.

\*Corresponding to Prof. Feng Zhu, Email: [zhufeng@zju.edu.cn](mailto:zhufeng@zju.edu.cn)

†These authors contributed equally: Ying Zhou, Yintao Zhang, Zhen Chen.

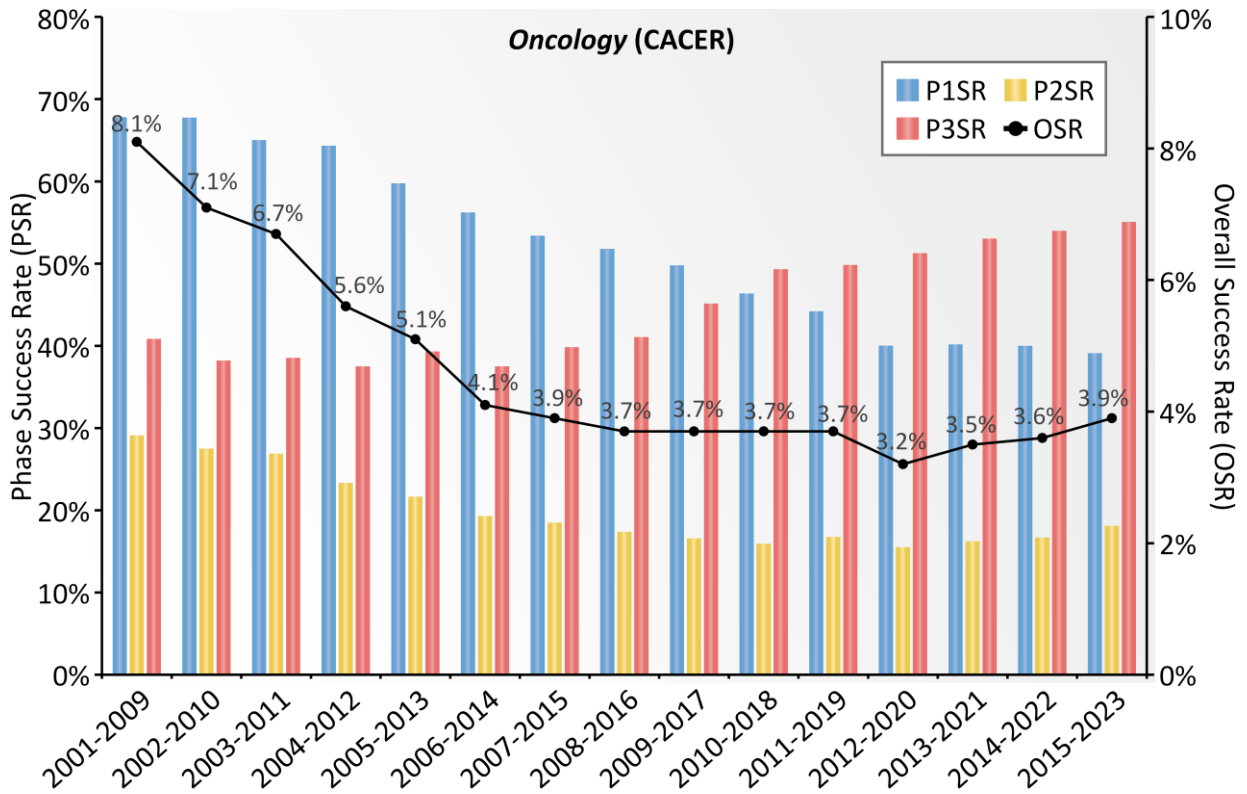

**Supplementary Figure S1.** The dynamic *clinical success rate* (ClinSR) evaluated based on the *CTPs of oncology (CACER)* collected for this study. A nine-year time-window was adopted here to facilitate the assessments of ClinSRs, which provided a drug adequate period of time to reach its final fate, and a total of fifteen time-windows (from 2001-2009 to 2015-2023, inclusive) were then assessed. The *phase success rates* (PSRs) of P1SR, P2SR and P3SR were shown using bars in blue, yellow and red, respectively. The dark line gave the dynamic variation in *overall success rate* (OSR). P1SR: Phase 1 success rate; P2SR: Phase 2 success rate; P3SR: Phase 3 success rate.

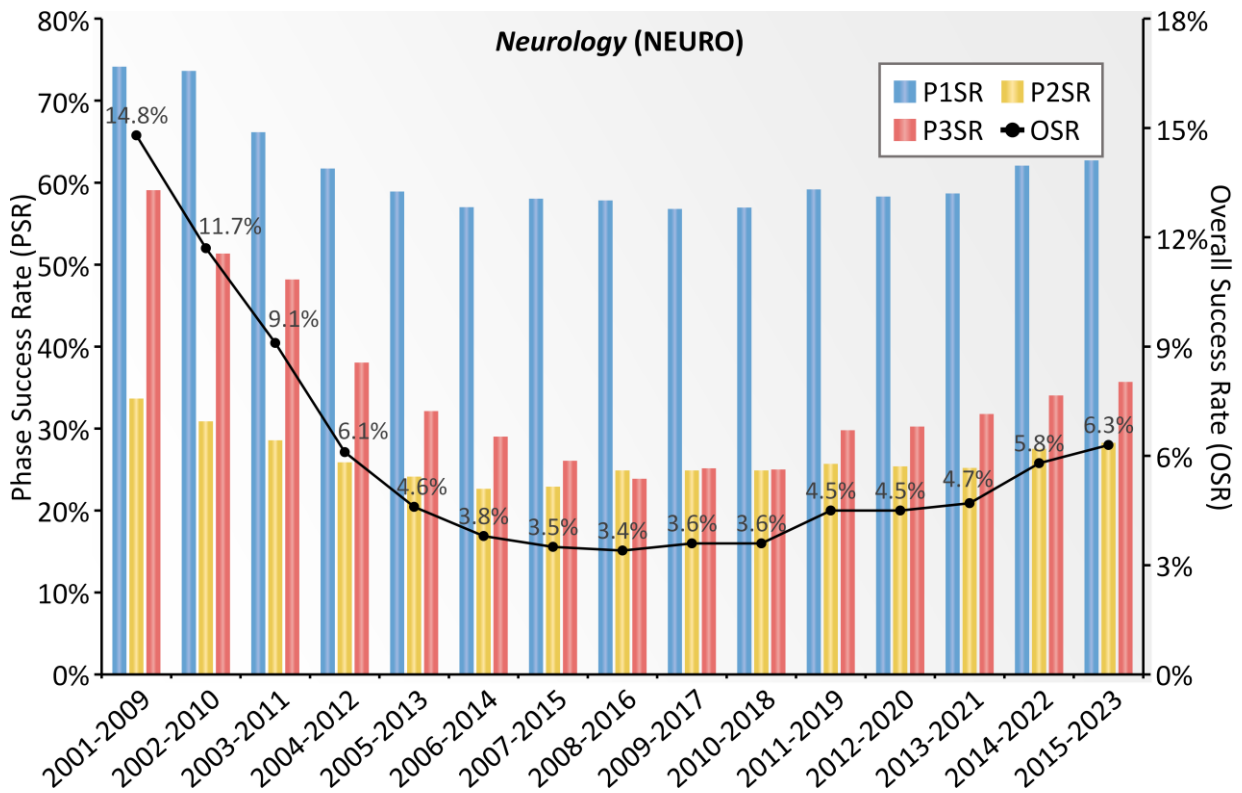

**Supplementary Figure S2.** Dynamic *clinical success rate* (ClinSR) assessed using the CTPs of *neurological disease* (NEURO) collected by this study. A nine-year time-window was used here to facilitate the assessments of ClinSRs, which provided a drug adequate period of time to reach its final fate, and a total of fifteen time-windows (from 2001-2009 to 2015-2023, inclusive) were then assessed. The *phase success rates* (PSRs) of P1SR, P2SR and P3SR were shown using bars in blue, yellow and red, respectively. The dark line gave the dynamic variation in *overall success rate* (OSR). P1SR: Phase 1 success rate; P2SR: Phase 2 success rate; P3SR: Phase 3 success rate.

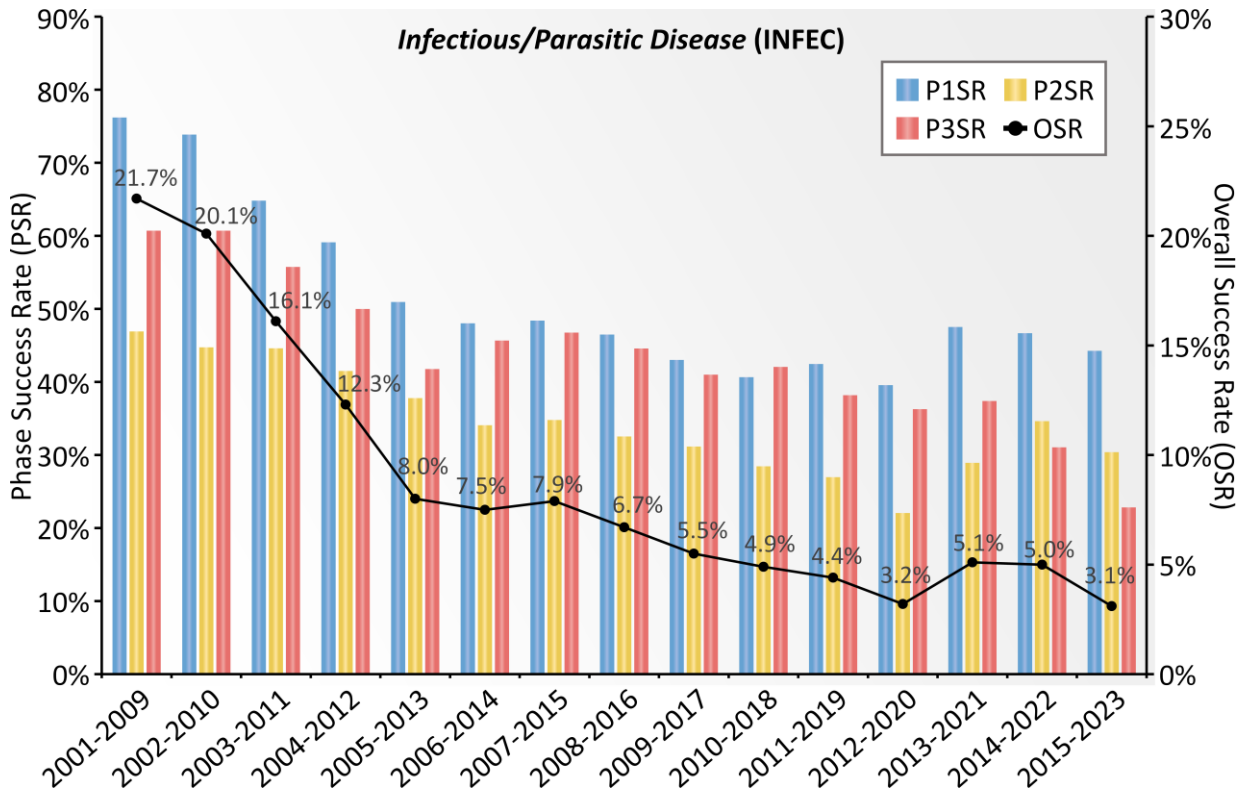

**Supplementary Figure S3.** Dynamic *clinical success rate* (ClinSR) assessed using the CTPs of *infectious/parasitic disease* (INFEC) collected for this study. A nine-year time-window was used to facilitate the assessments of ClinSRs, which provided a drug adequate period of time to reach its final fate, and a total of fifteen time-windows (from 2001-2009 to 2015-2023, inclusive) were then assessed. The *phase success rates* (PSRs) of P1SR, P2SR and P3SR were shown using bars in blue, yellow and red, respectively. The dark line gave the dynamic variation in *overall success rate* (OSR). P1SR: Phase 1 success rate; P2SR: Phase 2 success rate; P3SR: Phase 3 success rate.

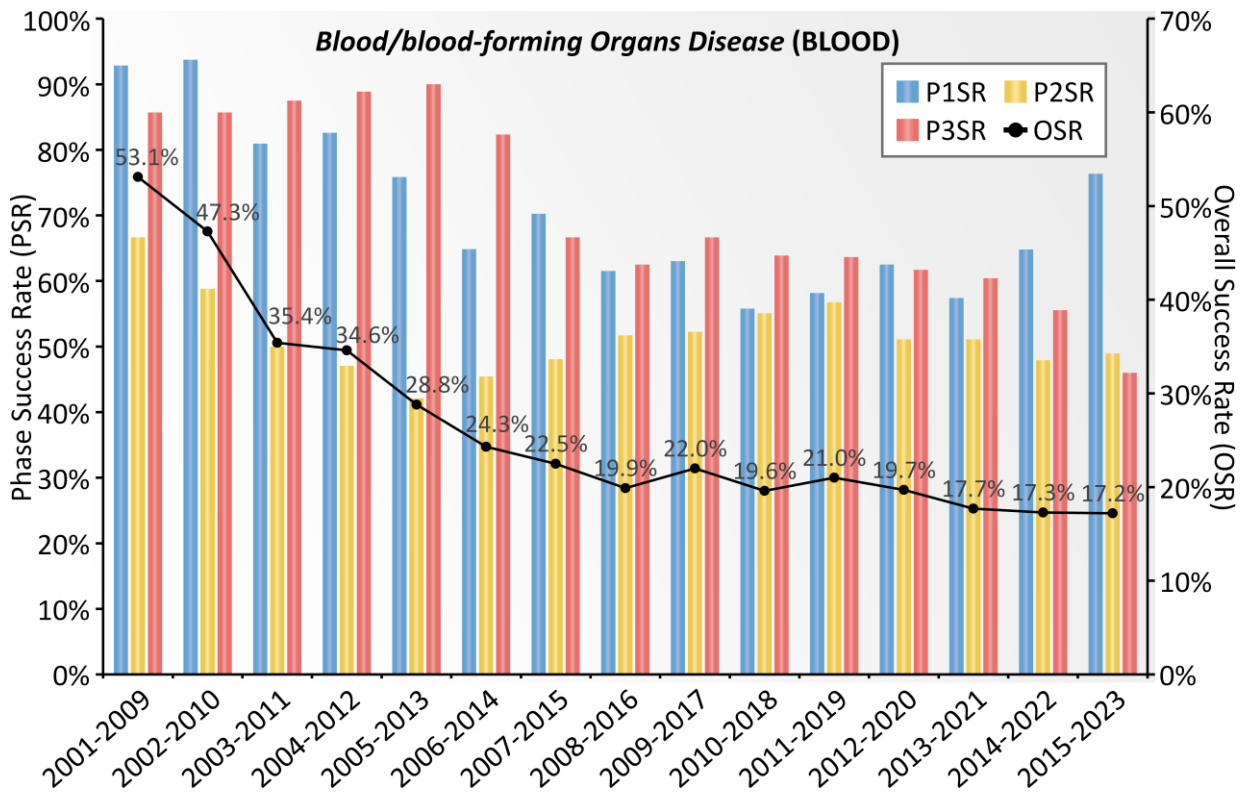

**Supplementary Figure S4.** Dynamic *clinical success rate* (ClinSR) assessed using the CTPs of *blood/blood-forming organs disease* (BLOOD) in this study. A nine-year time-window was used to facilitate the assessments of ClinSRs, which provided a drug adequate period of time to reach its final fate, and a total of fifteen time-windows (from 2001-2009 to 2015-2023, inclusive) were then assessed. The *phase success rates* (PSRs) of P1SR, P2SR and P3SR were shown using bars in blue, yellow and red, respectively. The dark line gave the dynamic variation in *overall success rate* (OSR). P1SR: Phase 1 success rate; P2SR: Phase 2 success rate; P3SR: Phase 3 success rate.

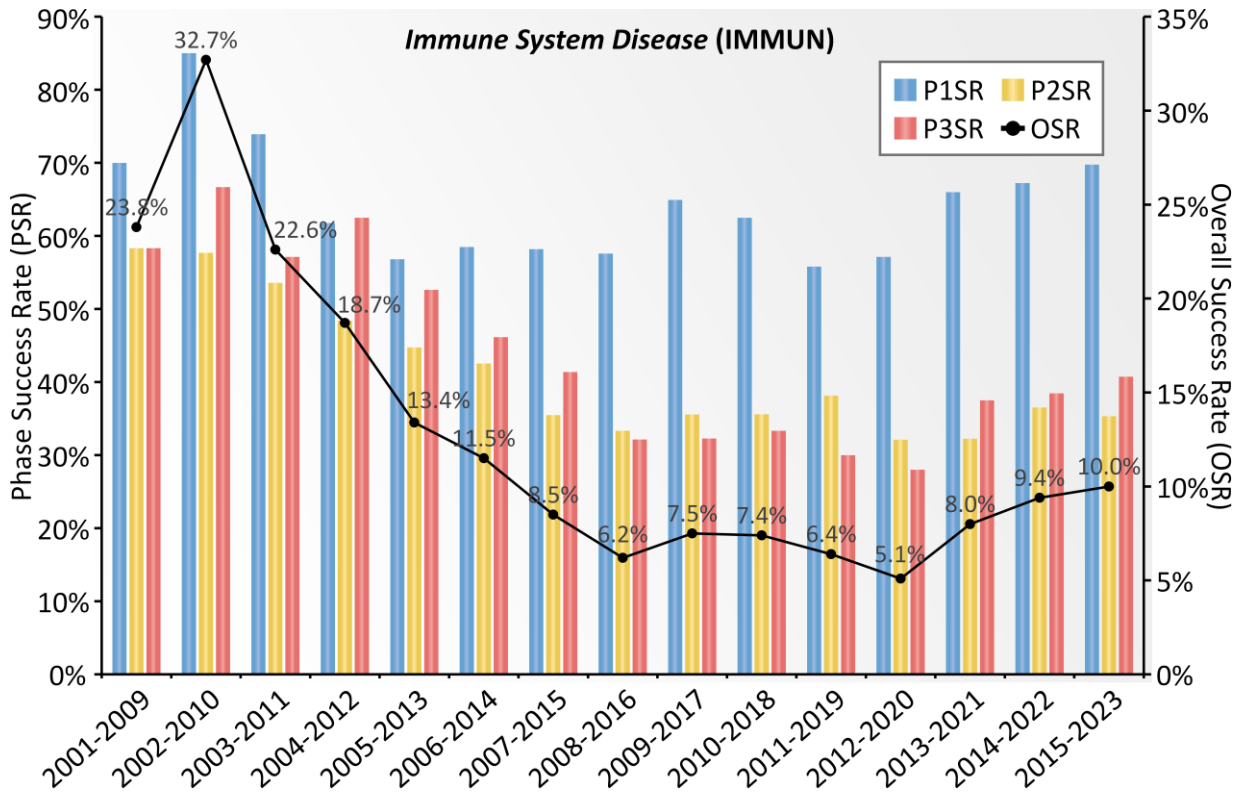

**Supplementary Figure S5.** Dynamic *clinical success rate* (ClinSR) assessed using the CTPs of *immune system disease* (IMMNU) collected by this study. A nine-year time-window was adopted to facilitate the assessments of ClinSRs, which provided a drug adequate period of time to reach its final fate, and a total of fifteen time-windows (from 2001-2009 to 2015-2023, inclusive) were then assessed. The *phase success rates* (PSRs) of P1SR, P2SR and P3SR were shown using bars in blue, yellow and red, respectively. The dark line gave the dynamic variation in *overall success rate* (OSR). P1SR: Phase 1 success rate; P2SR: Phase 2 success rate; P3SR: Phase 3 success rate.

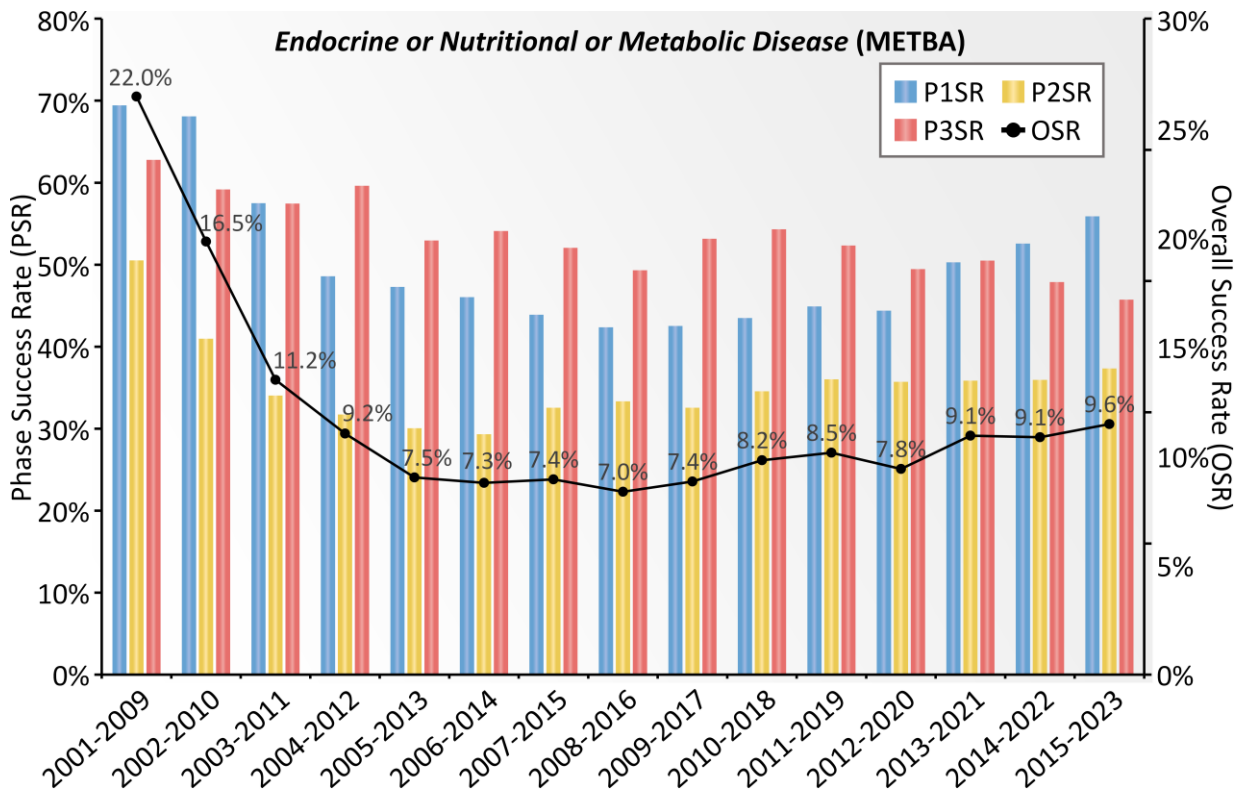

**Supplementary Figure S6.** Dynamic *clinical success rate* (ClinSR) assessed using the CTPs of *endocrine, nutritional or metabolic disease* (METAB). A nine-year time-window was used here to facilitate the assessments of ClinSRs, which provided a drug adequate period of time to reach its final fate, and a total of fifteen time-windows (from 2001-2009 to 2015-2023, inclusive) were then assessed. The *phase success rates* (PSRs) of P1SR, P2SR and P3SR were shown using bars in blue, yellow and red, respectively. The dark line gave the dynamic variation in *overall success rate* (OSR). P1SR: Phase 1 success rate; P2SR: Phase 2 success rate; P3SR: Phase 3 success rate.

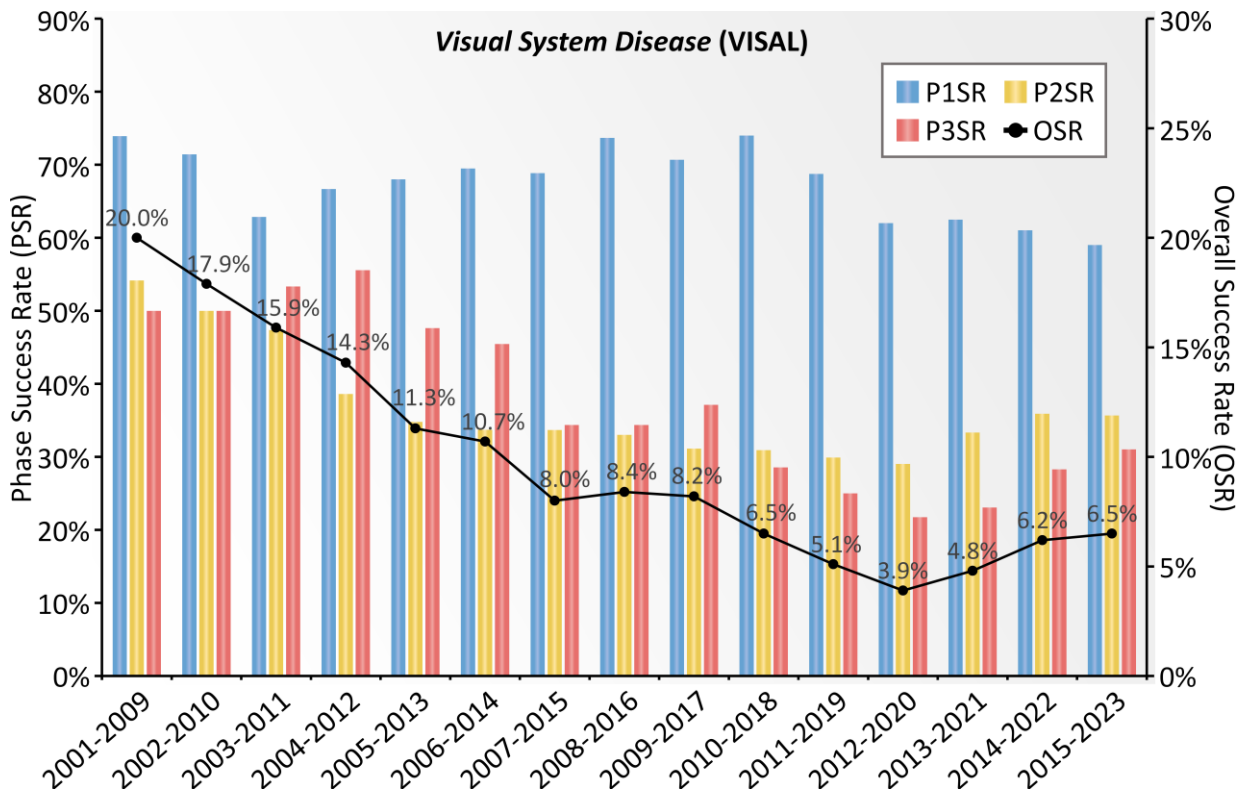

**Supplementary Figure S7.** Dynamic *clinical success rate* (ClinSR) assessed using the CTPs of *visual system disease* (VISAL) collected for this study. A nine-year time-window was used here to facilitate the assessments of ClinSRs, which provided a drug adequate period of time to reach its final fate, and a total of fifteen time-windows (from 2001-2009 to 2015-2023, inclusive) were then assessed. The *phase success rates* (PSRs) of P1SR, P2SR and P3SR were shown using bars in blue, yellow and red, respectively. The dark line gave the dynamic variation in *overall success rate* (OSR). P1SR: Phase 1 success rate; P2SR: Phase 2 success rate; P3SR: Phase 3 success rate.



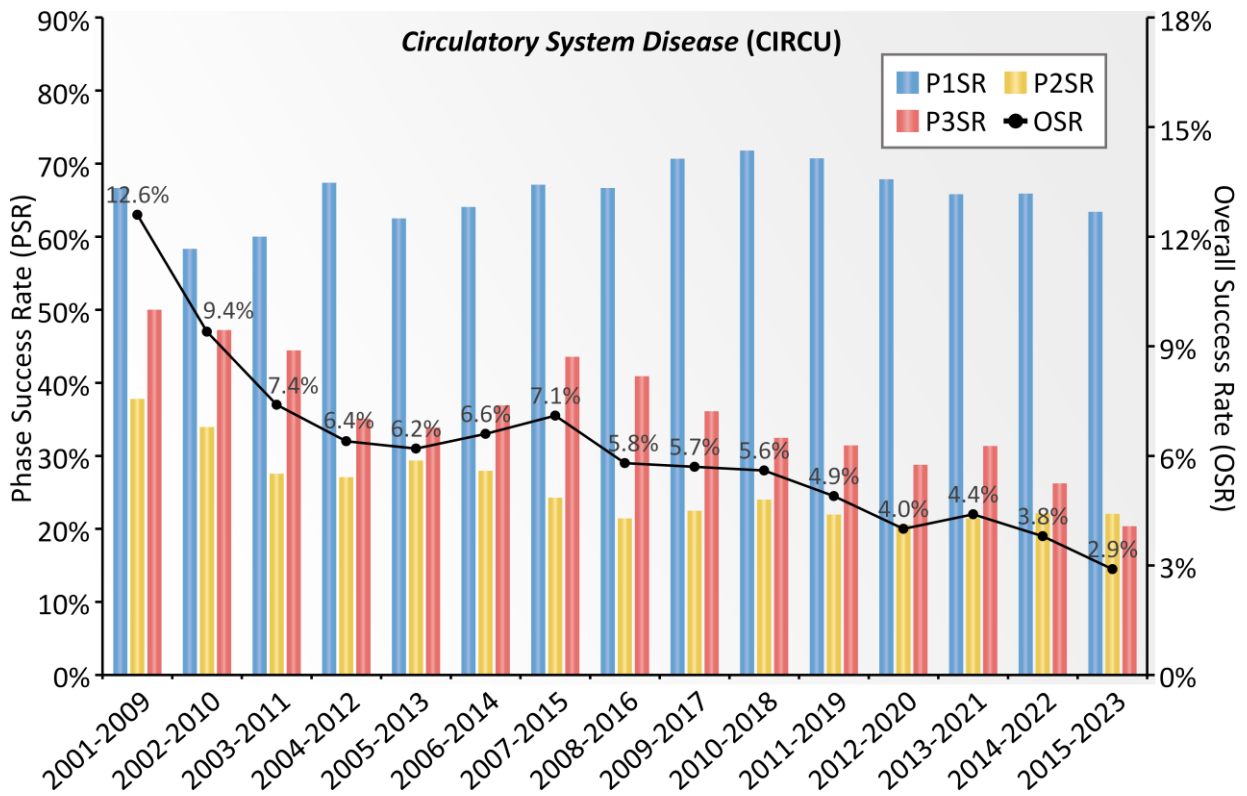

**Supplementary Figure S8.** Dynamic *clinical success rate* (ClinSR) assessed using the CTPs of *circulatory system disease* (CIRCU) collected for this study. A nine-year time-window was used to facilitate the assessments of ClinSRs, which provided a drug adequate period of time to reach its final fate, and a total of fifteen time-windows (from 2001-2009 to 2015-2023, inclusive) were then assessed. The *phase success rates* (PSRs) of P1SR, P2SR and P3SR were shown using bars in blue, yellow and red, respectively. The dark line gave the dynamic variation in *overall success rate* (OSR). P1SR: Phase 1 success rate; P2SR: Phase 2 success rate; P3SR: Phase 3 success rate.

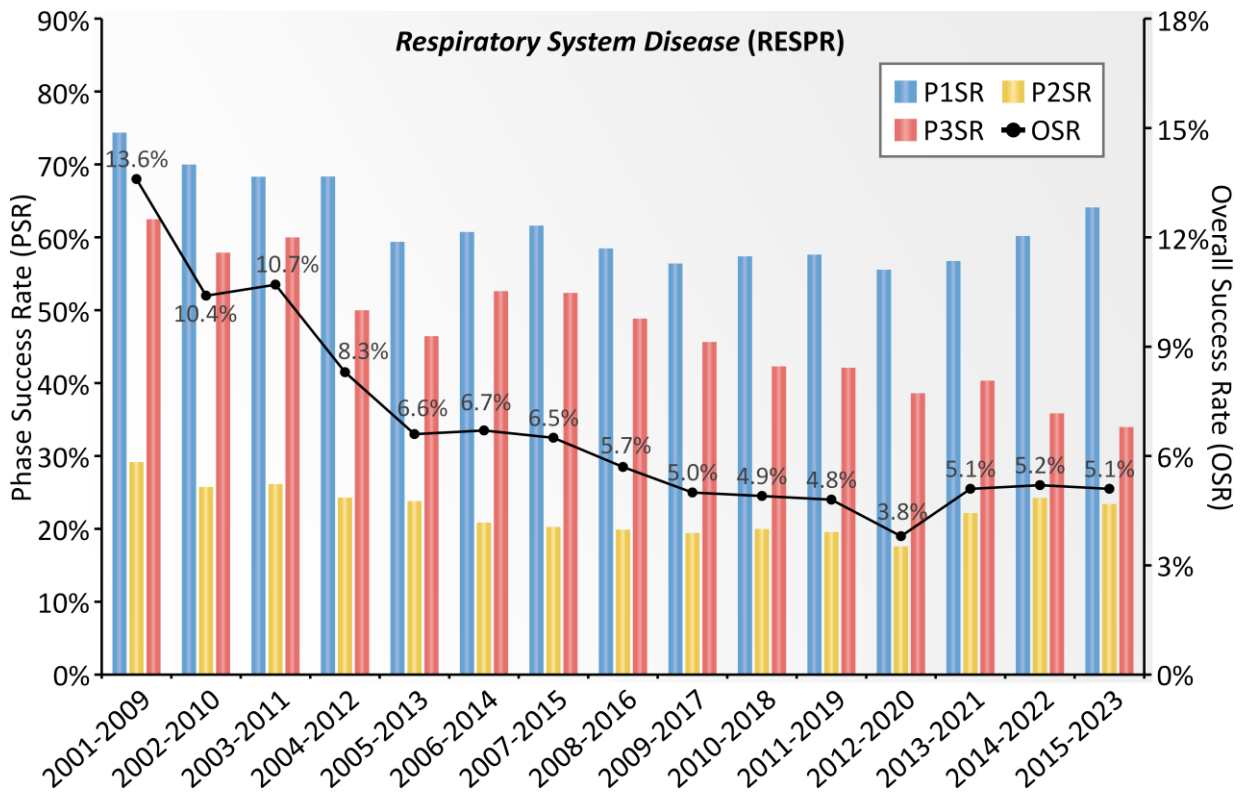

**Supplementary Figure S9.** Dynamic *clinical success rate* (ClinSR) assessed using the CTPs of *respiratory system disease* (RESPR) collected for this study. A nine-year time-window was used to facilitate the assessments of ClinSRs, which provided a drug adequate period of time to reach its final fate, and a total of fifteen time-windows (from 2001-2009 to 2015-2023, inclusive) were then assessed. The *phase success rates* (PSRs) of P1SR, P2SR and P3SR were shown using bars in blue, yellow and red, respectively. The dark line gave the dynamic variation in *overall success rate* (OSR). P1SR: Phase 1 success rate; P2SR: Phase 2 success rate; P3SR: Phase 3 success rate.

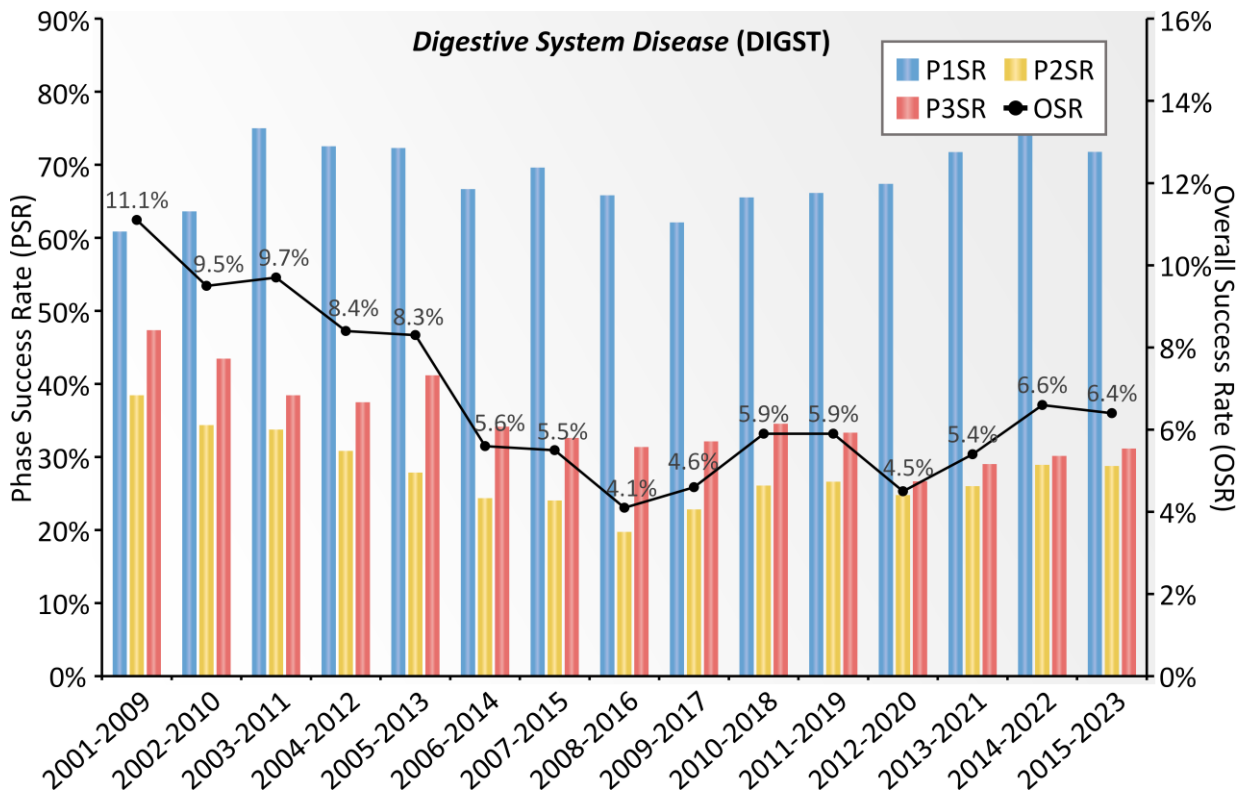

**Supplementary Figure S10.** Dynamic *clinical success rate* (ClinSR) evaluated using the CTPs of *digestive system disease* (DIGST) collected for this study. A nine-year time-window was used to facilitate the assessments of ClinSRs, which provided a drug adequate period of time to reach its final fate, and a total of fifteen time-windows (from 2001-2009 to 2015-2023, inclusive) were then assessed. The *phase success rates* (PSRs) of P1SR, P2SR and P3SR were shown using bars in blue, yellow and red, respectively. The dark line gave the dynamic variation in *overall success rate* (OSR). P1SR: Phase 1 success rate; P2SR: Phase 2 success rate; P3SR: Phase 3 success rate.

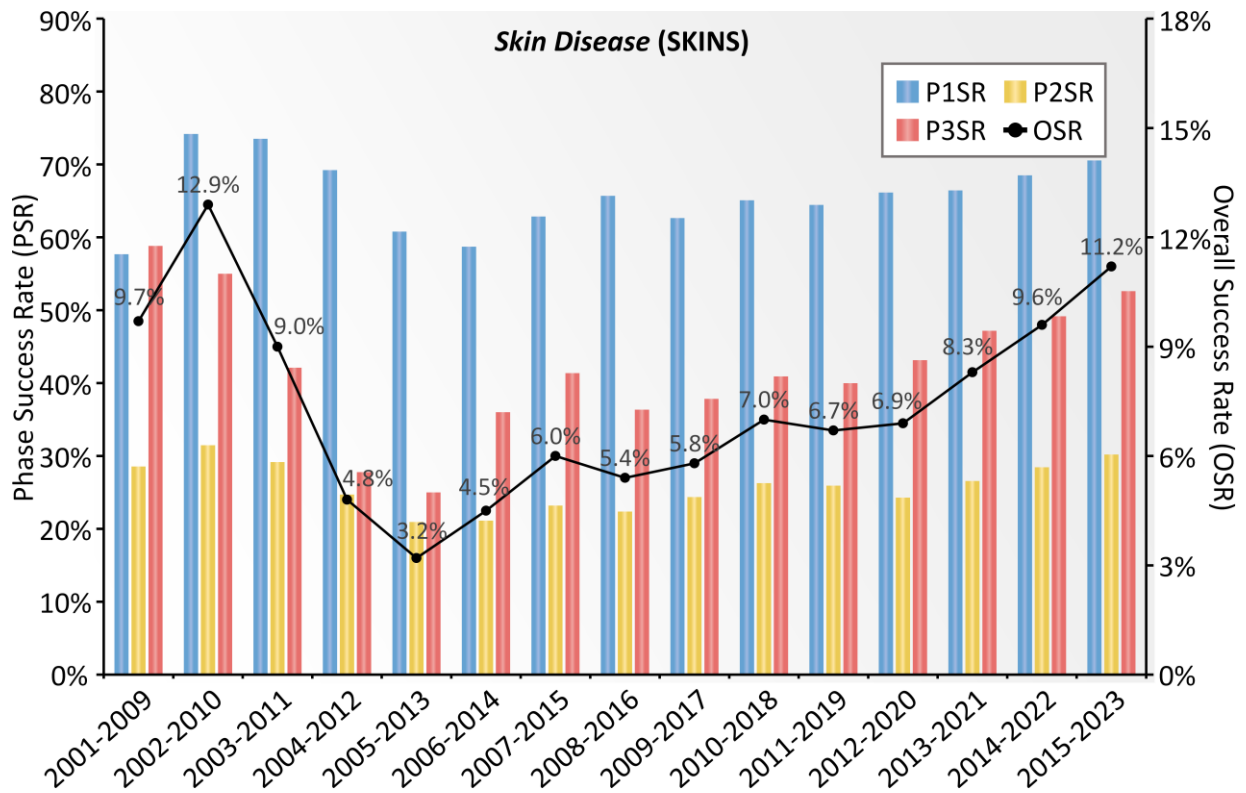

**Supplementary Figure S11.** The dynamic *clinical success rate* (ClinSR) assessed based on the CTPs of *skin disease (SKINS)* gathered in this study. A nine-year time-window was adopted here to facilitate the assessments of ClinSRs, which provided a drug adequate period of time to reach its final fate, and a total of fifteen time-windows (from 2001-2009 to 2015-2023, inclusive) were then assessed. The *phase success rates* (PSRs) of P1SR, P2SR and P3SR were shown using bars in blue, yellow and red, respectively. The dark line gave the dynamic variation in *overall success rate* (OSR). P1SR: Phase 1 success rate; P2SR: Phase 2 success rate; P3SR: Phase 3 success rate.

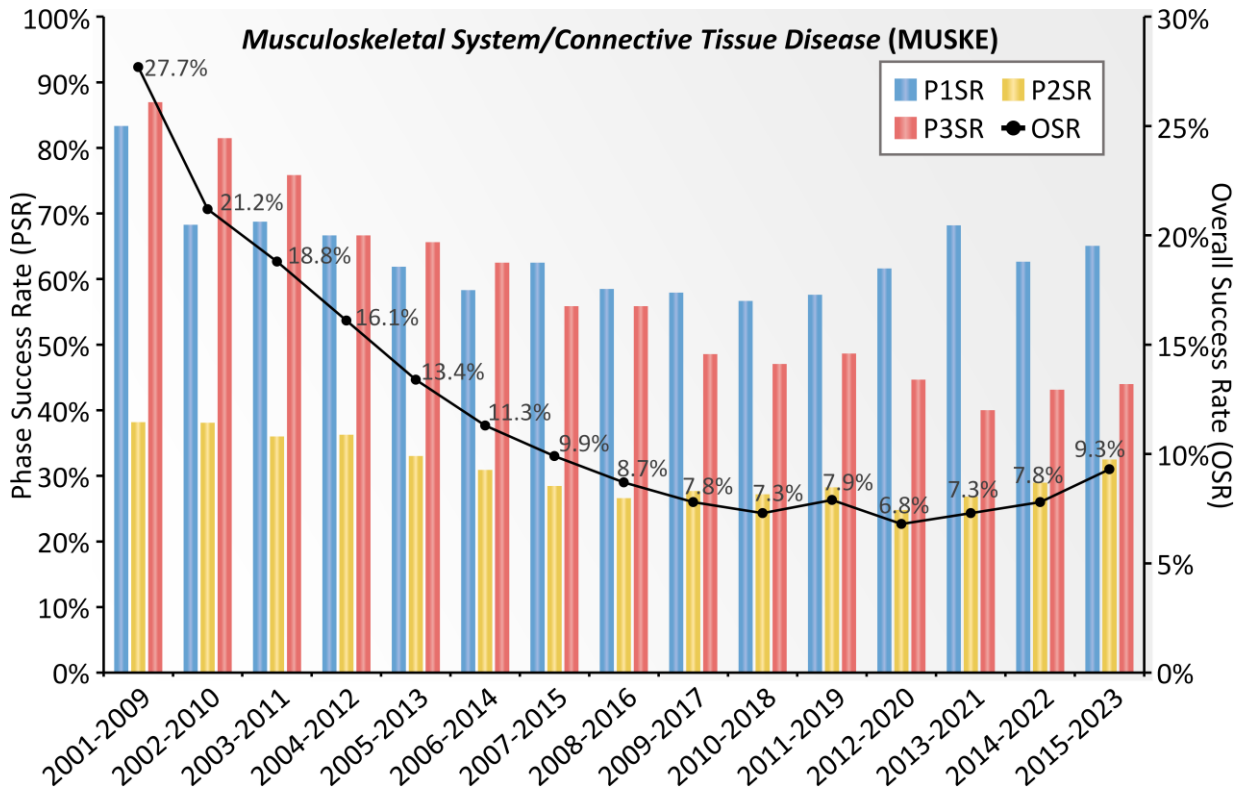

**Supplementary Figure S12.** Dynamic *clinical success rate* (ClinSR) measured by the CTPs of *musculoskeletal system/connective tissue disease* (MUSKE). A nine-year time-window was used to facilitate the assessments of ClinSRs, which provided a drug adequate period of time to reach its final fate, and a total of fifteen time-windows (from 2001-2009 to 2015-2023, inclusive) were then assessed. The *phase success rates* (PSRs) of P1SR, P2SR and P3SR were shown using bars in blue, yellow and red, respectively. The dark line gave the dynamic variation in *overall success rate* (OSR). P1SR: Phase 1 success rate; P2SR: Phase 2 success rate; P3SR: Phase 3 success rate.

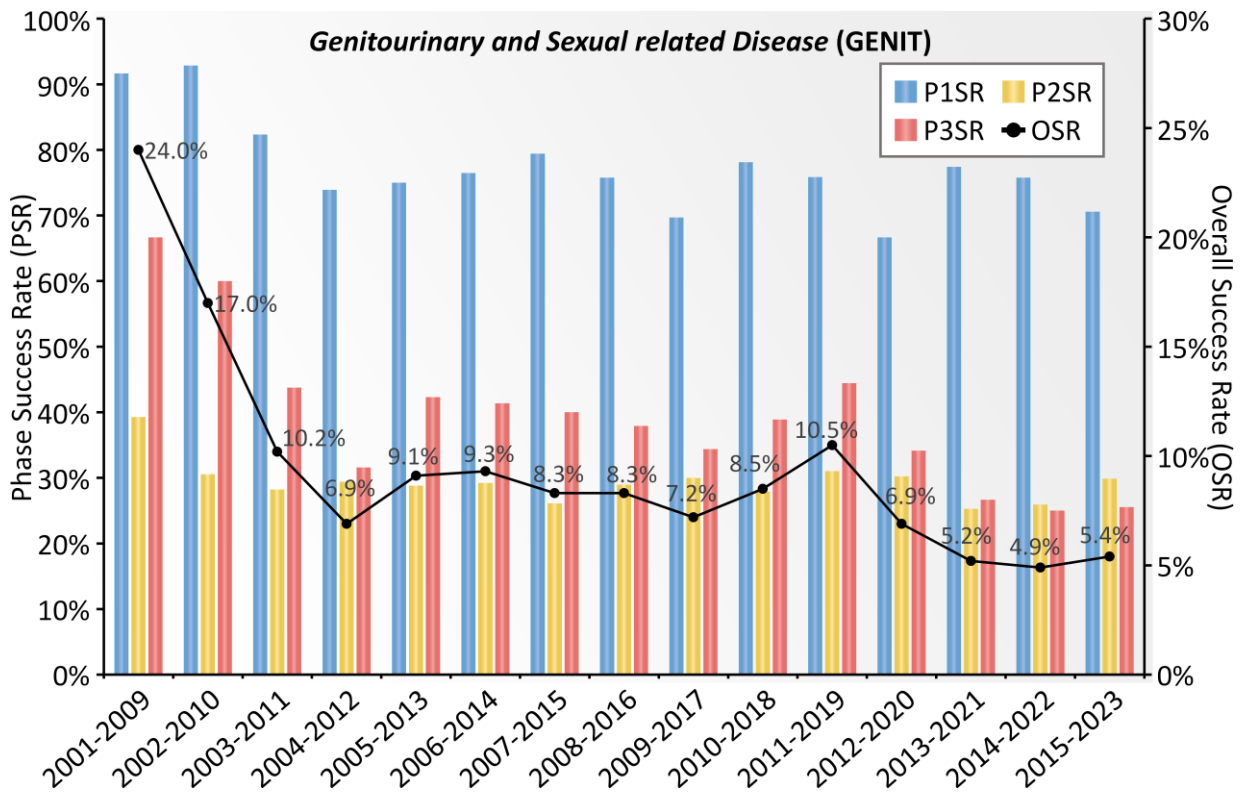

**Supplementary Figure S13.** Dynamic *clinical success rate* (ClinSR) measured by the CTPs of *genitourinary and sexual related disease* (GENIT). A nine-year time-window was adopted here to facilitate the assessments of ClinSRs, which provided a drug adequate period of time to reach its final fate, and a total of fifteen time-windows (from 2001-2009 to 2015-2023, inclusive) were then assessed. The *phase success rates* (PSRs) of P1SR, P2SR and P3SR were shown using bars in blue, yellow and red, respectively. The dark line gave the dynamic variation in *overall success rate* (OSR). P1SR: Phase 1 success rate; P2SR: Phase 2 success rate; P3SR: Phase 3 success rate.

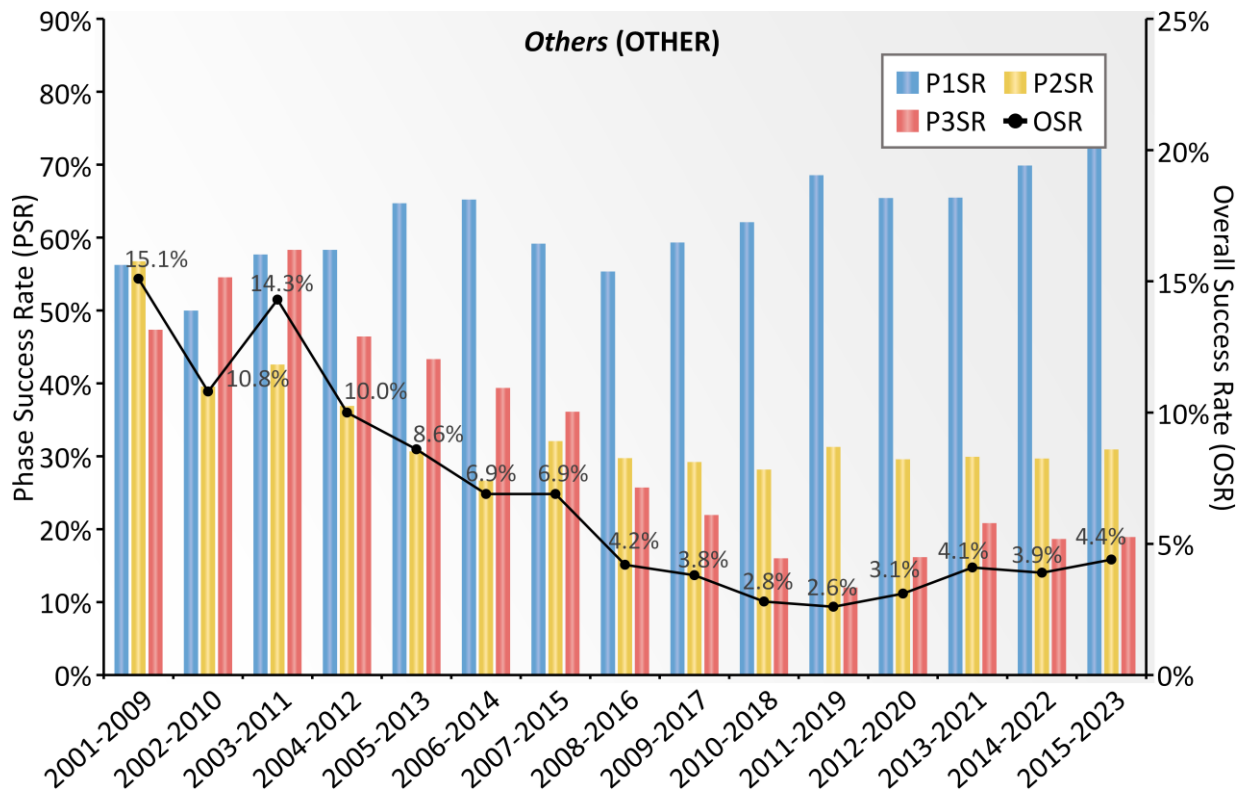

**Supplementary Figure S14.** The dynamic *clinical success rate* (ClinSR) measured by the CTPs of *other diseases* (OTHER) collected for this study. A nine-year time-window was adopted here to facilitate the assessments of ClinSRs, which provided a drug adequate period of time to reach its final fate, and a total of fifteen time-windows (from 2001-2009 to 2015-2023, inclusive) were then assessed. The *phase success rates* (PSRs) of P1SR, P2SR and P3SR were shown using bars in blue, yellow and red, respectively. The dark line gave the dynamic variation in *overall success rate* (OSR). P1SR: Phase 1 success rate; P2SR: Phase 2 success rate; P3SR: Phase 3 success rate.

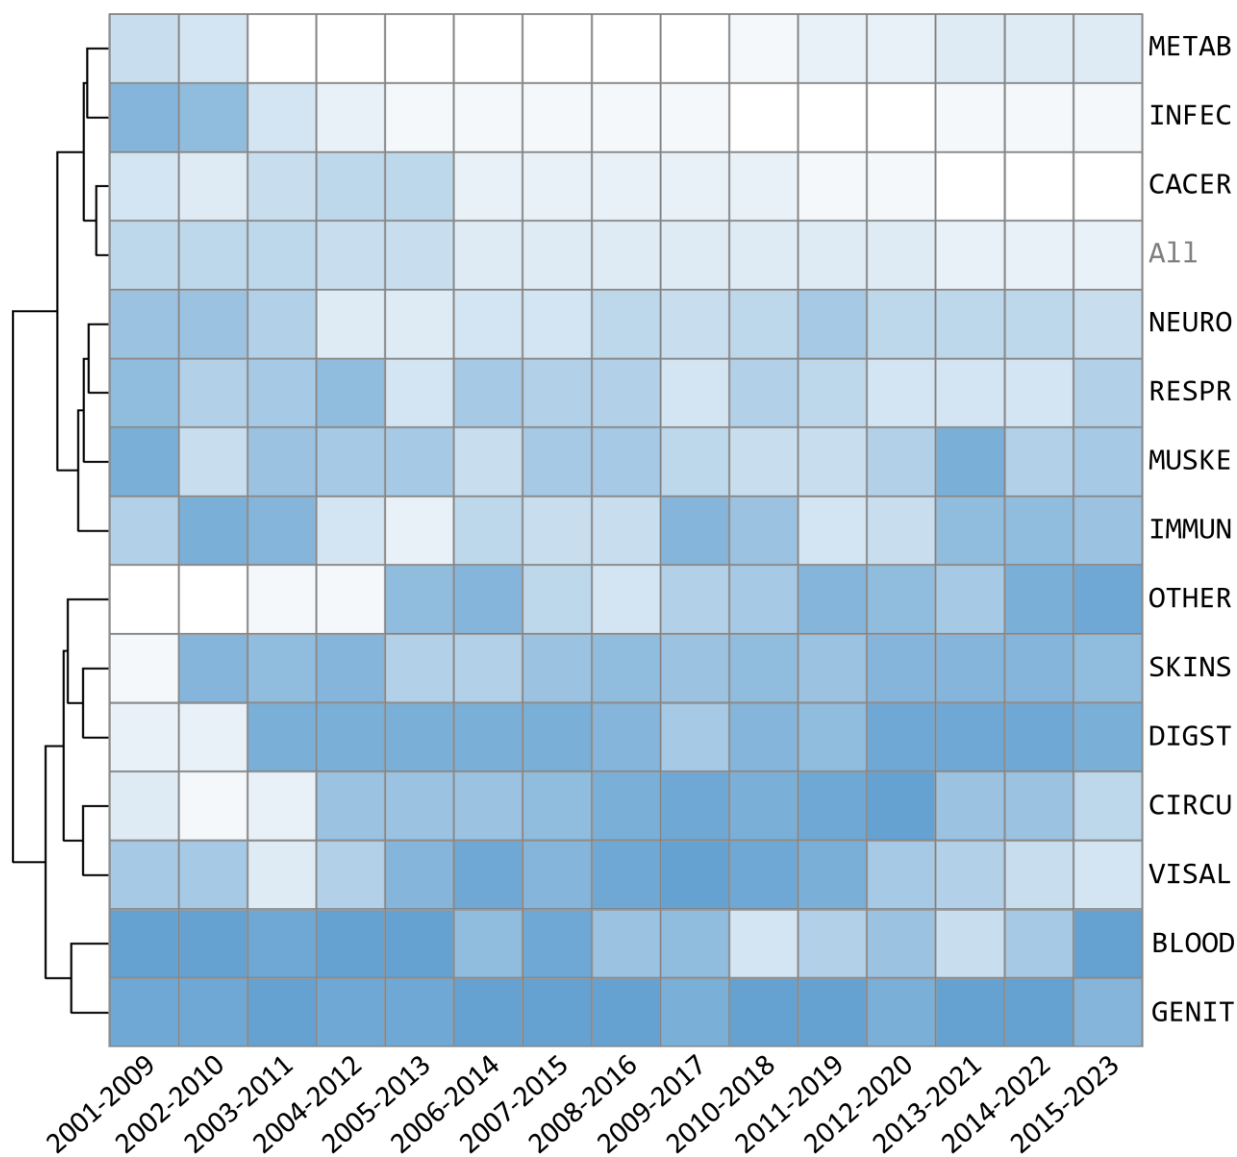

**Supplementary Figure S15.** Hierarchical clustering of fifteen different disease classes based on their *phase 1 success rate (PISR)* across fifteen consecutive time-windows. The darker the blue color, the higher the success rate of clinical drug development in the corresponding time-window and the corresponding indication. All: all disease indication; INFEC: infectious/parasitic disease; BLOOD: blood/blood-forming organs disease; CACER: oncology; CIRCUL: circulatory system disease; DIGST: digestive system disease; SKINS: skin disease; METAB: endocrine, nutritional or metabolic disease; RESPR: respiratory system disease; MUSKE: musculoskeletal system and connective tissue disease; GENIT: genitourinary and sexual related disease; NEURO: neurology; VISAL: visual system disease; IMMUN: immune system disease; OTHER: Other disease.



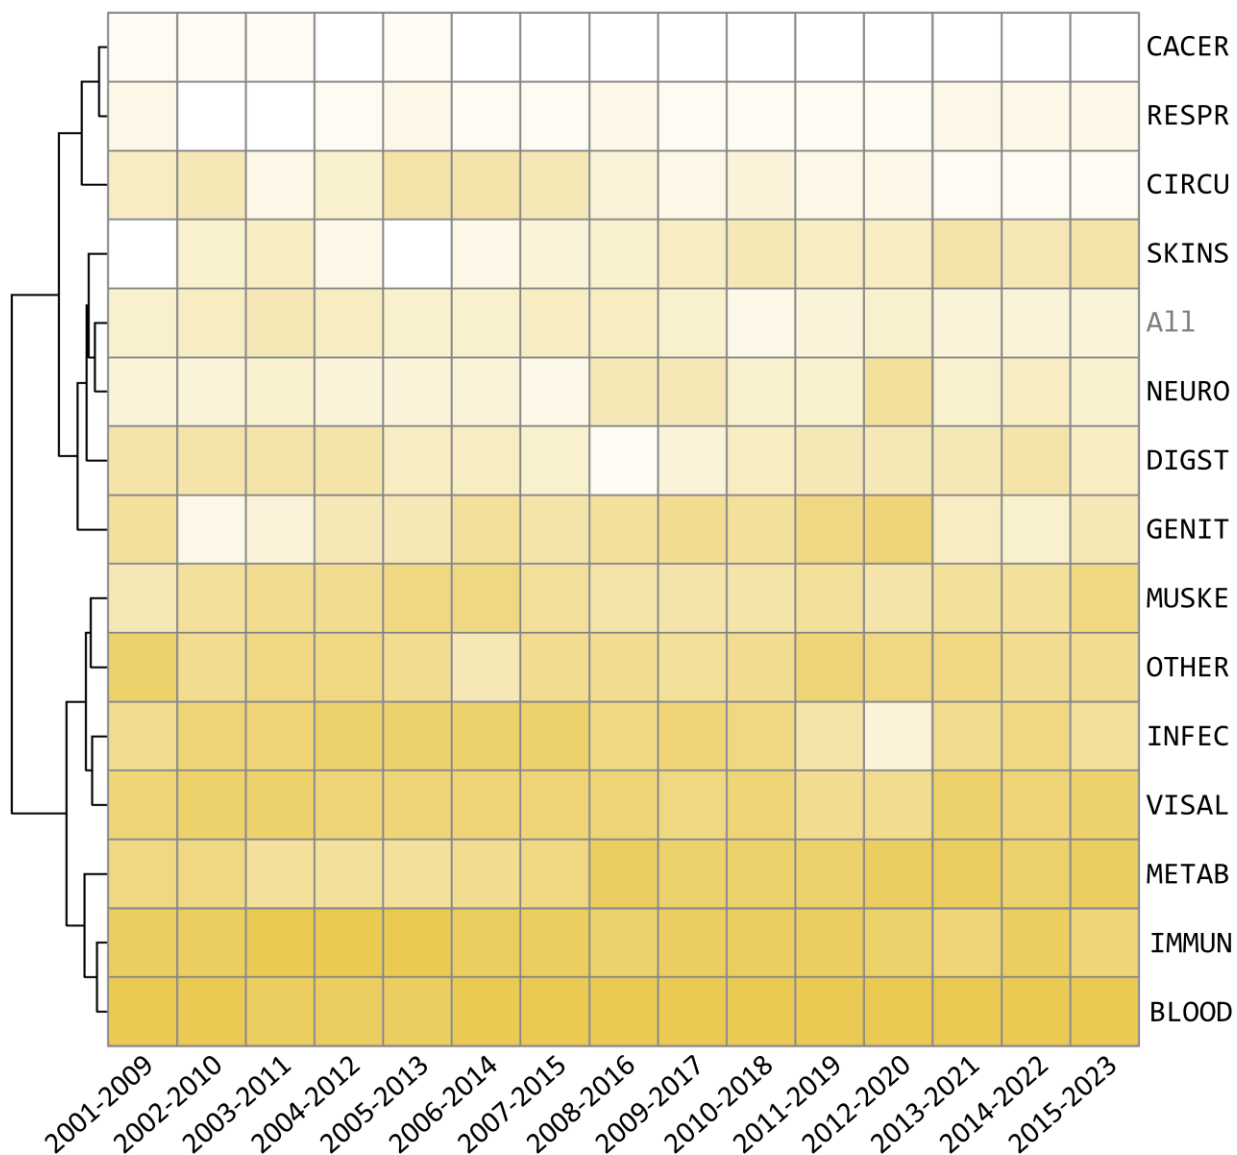

**Supplementary Figure S16.** Hierarchical clustering of fifteen different disease classes based on the *phase 2 success rate (P2SR)* across fifteen consecutive time-windows. The darker the yellow color, the higher the success rate of clinical drug development in the corresponding time-window and the corresponding indication. All: all disease indication; INFEC: infectious/parasitic disease; BLOOD: blood/blood-forming organs disease; CACER: oncology; CIRCU: circulatory system disease; DIGST: digestive system disease; SKINS: skin disease; METAB: endocrine, nutritional or metabolic disease; RESPR: respiratory system disease; MUSKE: musculoskeletal system and connective tissue disease; GENIT: genitourinary and sexual related disease; NEURO: neurology; VISAL: visual system disease; IMMUN: immune system disease; OTHER: Other disease.

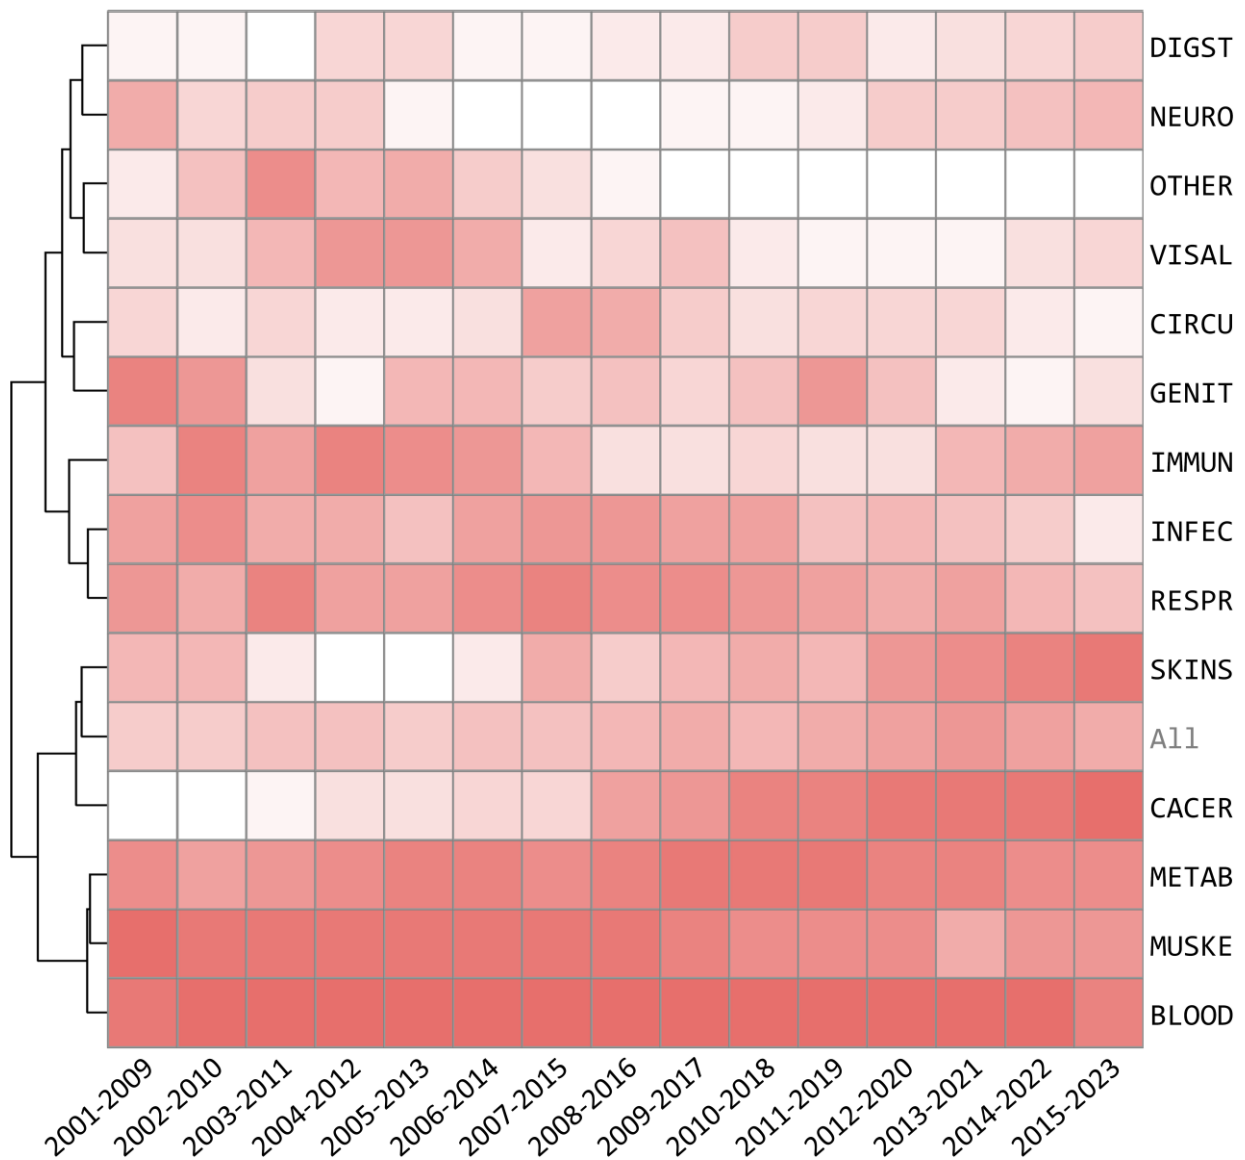

**Supplementary Figure S17.** Hierarchical clustering of fifteen different disease classes based on their *phase 3 success rate (P3SR)* across fifteen consecutive time-windows. The darker the red color, the higher the success rate of clinical drug development in the corresponding time-window and the corresponding indication. All: all disease indication; INFEC: infectious/parasitic disease; BLOOD: blood/blood-forming organs disease; CACER: oncology; CIRCU: circulatory system disease; DIGST: digestive system disease; SKINS: skin disease; METAB: endocrine, nutritional or metabolic disease; RESPR: respiratory system disease; MUSKE: musculoskeletal system and connective tissue disease; GENIT: genitourinary and sexual related disease; NEURO: neurology; VISAL: visual system disease; IMMUN: immune system disease; OTHER: Other disease.

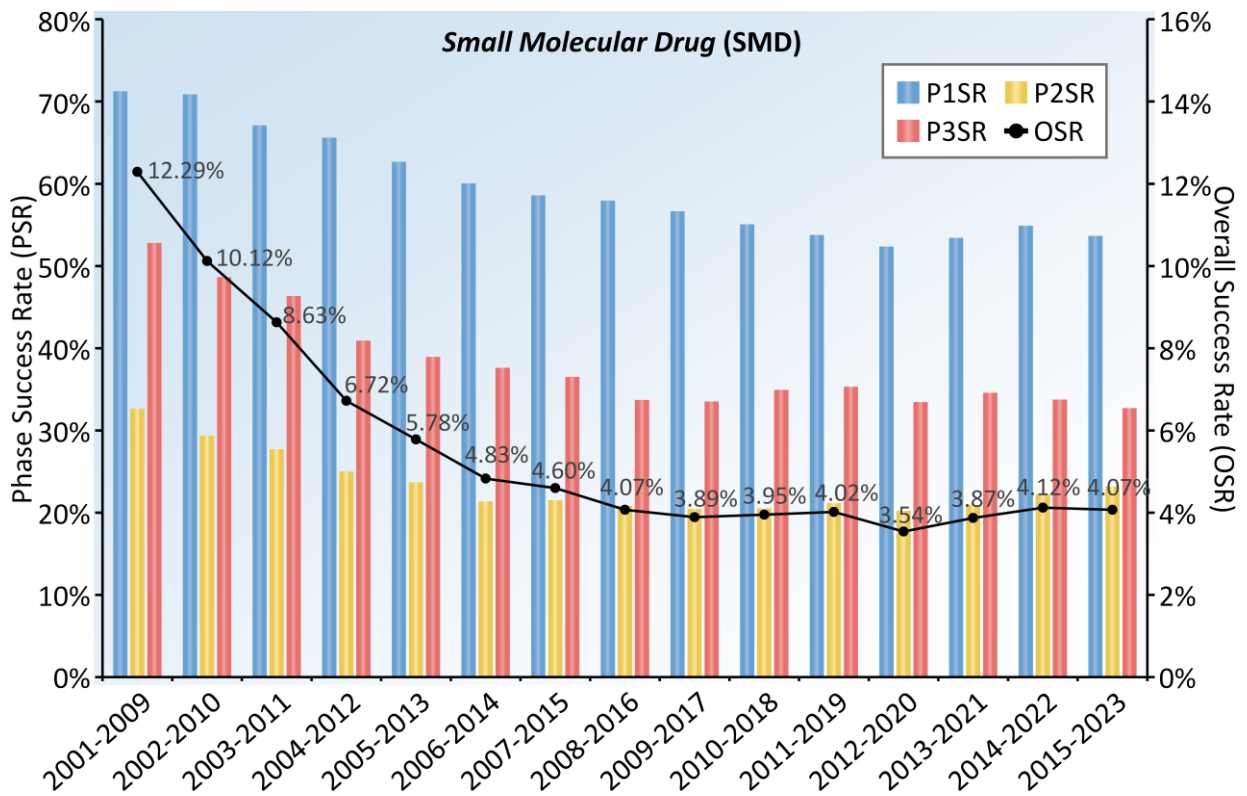

**Supplementary Figure S18.** The dynamic *clinical success rate* (ClinSR) measured by the CTPs of *small molecular drug* (SMD) collected for this study. A nine-year time-window was used here to facilitate the assessments of ClinSRs, which provided a drug adequate period of time to reach its final fate, and a total of fifteen time-windows (from 2001-2009 to 2015-2023, inclusive) were then assessed. The *phase success rates* (PSRs) of P1SR, P2SR and P3SR were shown using bars in blue, yellow and red, respectively. The dark line gave the dynamic variation in *overall success rate* (OSR). P1SR: Phase 1 success rate; P2SR: Phase 2 success rate; P3SR: Phase 3 success rate.

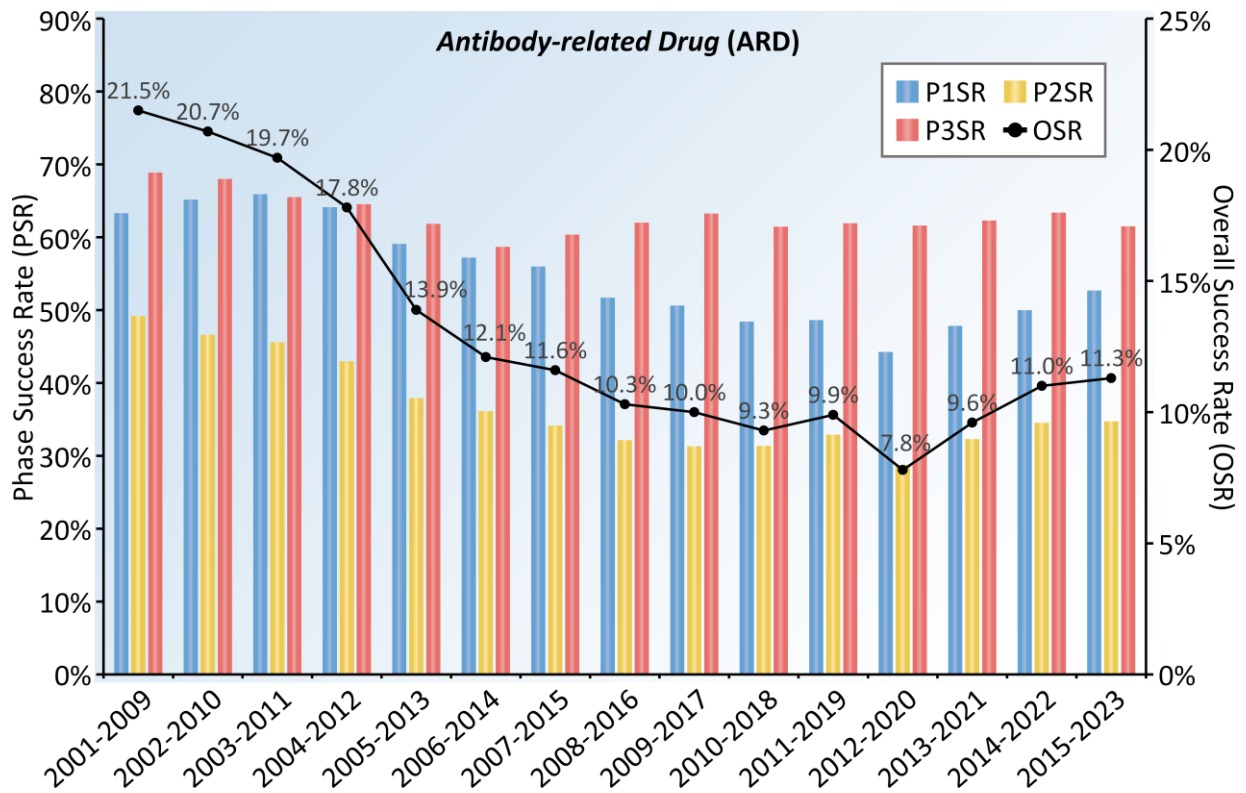

**Supplementary Figure S19.** The dynamic *clinical success rate* (ClinSR) measured by the CTPs of *antibody-related drug* (ARD) collected for this study. A nine-year time-window was used here to facilitate the assessments of ClinSRs, which provided a drug adequate period of time to reach its final fate, and a total of fifteen time-windows (from 2001-2009 to 2015-2023, inclusive) were then assessed. The *phase success rates* (PSRs) of P1SR, P2SR and P3SR were shown using bars in blue, yellow and red, respectively. The dark line gave the dynamic variation in *overall success rate* (OSR). P1SR: Phase 1 success rate; P2SR: Phase 2 success rate; P3SR: Phase 3 success rate.

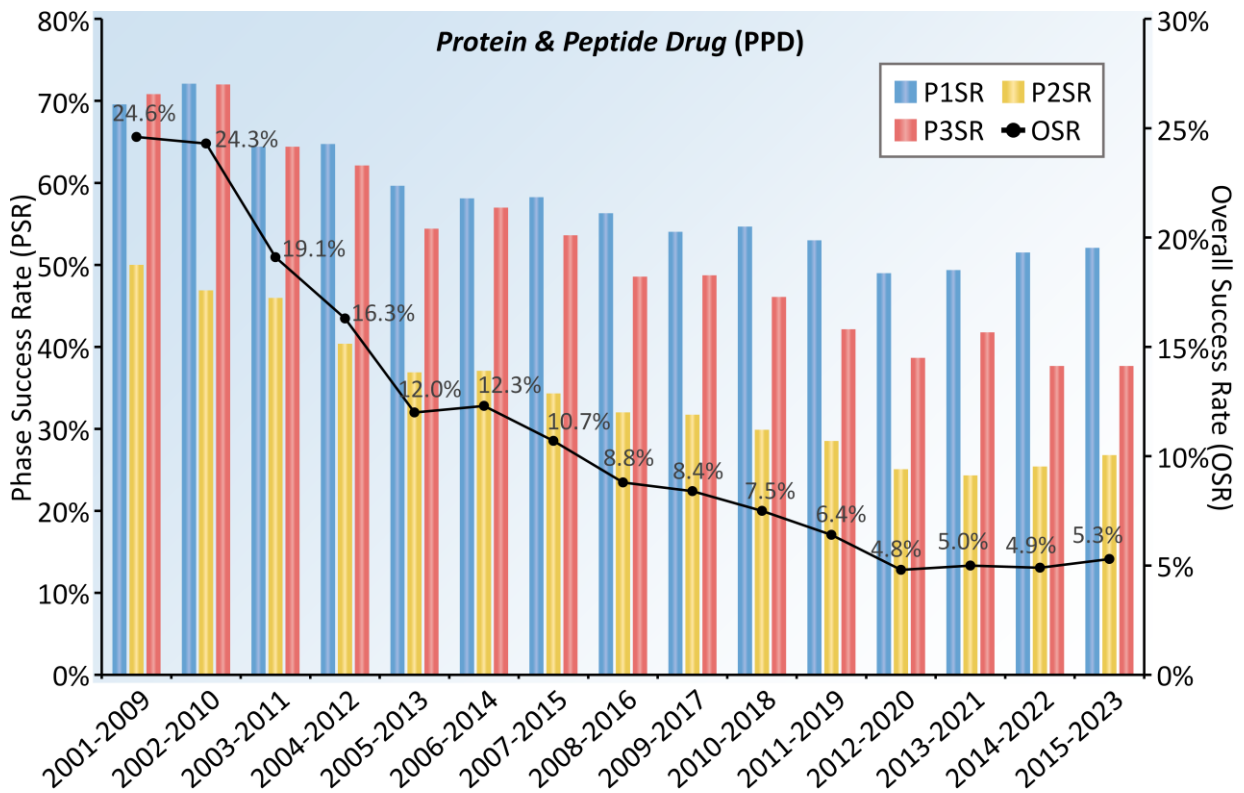

**Supplementary Figure S20.** The dynamic *clinical success rate* (ClinSR) measured by the CTPs of *protein & peptide drug* (PPD) collected for this study. A nine-year time-window was used here to facilitate the assessments of ClinSRs, which provided a drug adequate period of time to reach its final fate, and a total of fifteen time-windows (from 2001-2009 to 2015-2023, inclusive) were then assessed. The *phase success rates* (PSRs) of P1SR, P2SR and P3SR were shown using bars in blue, yellow and red, respectively. The dark line gave the dynamic variation in *overall success rate* (OSR). P1SR: Phase 1 success rate; P2SR: Phase 2 success rate; P3SR: Phase 3 success rate.

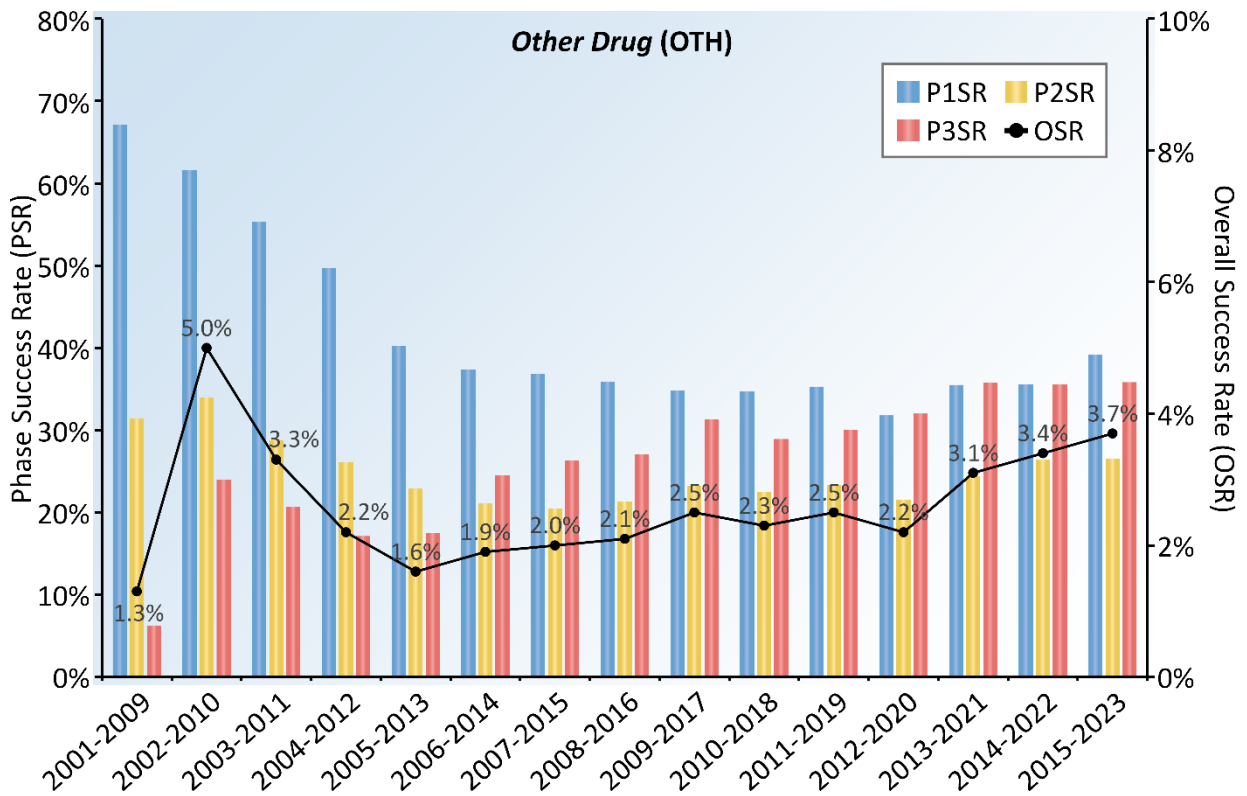

**Supplementary Figure S21.** The dynamic *clinical success rate* (ClinSR) assessed based on the CTPs of *other drug* (OTH) collected for this study. A nine-year time-window was adopted here to facilitate the assessments of ClinSRs, which provided a drug adequate period of time to reach its final fate, and a total of fifteen time-windows (from 2001-2009 to 2015-2023, inclusive) were then assessed. The *phase success rates* (PSRs) of P1SR, P2SR and P3SR were shown using bars in blue, yellow and red, respectively. The dark line gave the dynamic variation in *overall success rate* (OSR). P1SR: Phase 1 success rate; P2SR: Phase 2 success rate; P3SR: Phase 3 success rate.

**Supplementary Table S1.** The representative studies previously published that related to the analysis of *clinical success rate* (ClinSR) of drugs.

| <b>(a) Representative studies analyzing the success rates for the whole industry</b>                |                                            |
|-----------------------------------------------------------------------------------------------------|--------------------------------------------|
| Approval success rates of drug candidates based on target, action, modality, and their combinations | <i>Clin Transl Sci.</i> 2021; 14: 1113     |
| Trends in clinical success rates and therapeutic focus                                              | <i>Nat Rev Drug Discov.</i> 2019; 18: 495  |
| Estimation of clinical trial success rates and related parameters                                   | <i>Biostatistics.</i> 2019; 20: 273        |
| Trends in clinical success rates                                                                    | <i>Nat Rev Drug Discov.</i> 2016; 15: 379  |
| Clinical development success rates for investigational drugs                                        | <i>Nat Biotechnol.</i> 2014; 32: 40        |
| Trends in risks associated with new drug development success rates for investigational drugs        | <i>Clin Pharmacol Ther.</i> 2010; 87: 272  |
| Can the pharmaceutical industry reduce attrition rates                                              | <i>Nat Rev Drug Discov.</i> 2004; 3: 711   |
| <b>(b) Representative studies analyzing the success rates for certain disease class</b>             |                                            |
| Development times and approval success rates for drugs to treat <b>infectious diseases</b>          | <i>Clin Pharmacol Ther.</i> 2020; 107: 324 |
| Changes in clinical trials of <b>cancer</b> drugs in mainland China over the decade 2009-18         | <i>Lancet Oncol.</i> 2019; 20: e619        |
| Lessons learned from two decades of <b>anticancer</b> drugs                                         | <i>Trends Pharmacol Sci.</i> 2017; 38: 852 |
| A quantitative analysis of therapeutic <b>cancer vaccines</b> in phase 2 or phase 3 trial           | <i>J Immunother Cancer.</i> 2015; 3:48     |
| Clinical approval success rates for investigational <b>cancer</b> drugs                             | <i>Clin Pharmacol Ther.</i> 2013; 94: 329  |
| Development trends for new <b>cancer</b> therapeutics and vaccines                                  | <i>Drug Discov Today.</i> 2008; 13: 30     |
| <b>(c) Representative studies analyzing the success rates for certain individual disease</b>        |                                            |
| The wider perspective twenty years of clinical trials in <b>myelodysplastic syndromes</b>           | <i>Br J Haematol.</i> 2022; 196: 329       |

|                                                                                                            |                                            |
|------------------------------------------------------------------------------------------------------------|--------------------------------------------|
| <b>Alzheimer's</b> disease key insights from two decades of clinical trial failures                        | <i>J Alzheimers Dis.</i> 2022; 87 :83      |
| <b>Parkinson's</b> disease drug development since 1999 a story of repurposing and relative success         | <i>J Parkinsons Dis.</i> 2021;11: 421      |
| Clinical trial risk in <b>leukemia</b> Biomarkers and trial design                                         | <i>Hematol Oncol.</i> 2021; 39: 105        |
| Transition probabilities for clinical trials investigating <b>individual diseases</b>                      | <i>Nat Rev Drug Discov.</i> 2019; 18: 658  |
| Drug development for <b>breast, colorectal, and non-small cell lung cancers</b> from 1979 to 2014          | <i>Cancer.</i> 2017; 123: 4672             |
| Clinical trial risk in <b>chronic obstructive pulmonary disease</b> the effects of drug class and criteria | <i>Respiration.</i> 2016; 91: 79           |
| Reducing clinical trial risk in <b>multiple sclerosis</b>                                                  | <i>Mult Scler Relat Disord.</i> 2016; 5: 8 |
| Clinical trial risk in <b>hepatitis C</b> endpoint selection and drug action                               | <i>CJG Hepatol.</i> 2016; 2016: 6260271    |
| Clinical trial success rates of anti- <b>obesity</b> agents the importance of combination therapies        | <i>Obes Rev.</i> 2015; 16: 707             |
| <b>Alzheimer's</b> disease drug-development pipeline few candidates, frequent failures                     | <i>Alzheimers Res Ther.</i> 2014; 6 :37    |
| Clinical trial risk in <b>Non-Hodgkin's lymphoma</b> endpoint and target selection                         | <i>J Pharm Pharm Sci.</i> 2011; 14: 227    |
| The success rate of new drug development in clinical trials <b>Crohn's disease</b>                         | <i>J Pharm Pharm Sci.</i> 2010;13: 191     |
| <b>(d) Representative studies analyzing the success rates for a certain company</b>                        |                                            |
| Achieving end-to-end success in the clinic <b>Pfizer's</b> learnings on R&D productivity                   | <i>Drug Discov Today.</i> 2022; 27: 697    |
| Reviving an R&D pipeline a step change in the Phase II success rate                                        | <i>Drug Discov Today.</i> 2021; 26: 308    |



**Supplementary Table S2.** The *phase 1 success rates* (P1SRs) for all CTPs and the CTPs of particular disease class (a total of 14 classes defined by WHO ICD-11) calculated across fifteen nine-year time-windows. All: all diseases; INFEC: Infectious/parasitic disease; CACER: Oncology; BLOOD: Blood/blood-forming organs disease; IMMUN: Immune system disease; METAB: Endocrine, nutritional or metabolic disease; NEURO: Neurology; VISAL: Visual system disease; CIRCU: Circulatory system disease; RESPR: Respiratory system disease; DIGST: Digestive system disease; SKINS: Skin disease; MUSKE: Musculoskeletal system/connective tissue disease; GENIT: Genitourinary and sexual related disease; OTHER: Other disease.

| <b>Disease Class</b> | <b>2001<br/>-2009</b> | <b>2002<br/>-2010</b> | <b>2003<br/>-2011</b> | <b>2004<br/>-2012</b> | <b>2005<br/>-2013</b> | <b>2006<br/>-2014</b> | <b>2007<br/>-2015</b> | <b>2008<br/>-2016</b> | <b>2009<br/>-2017</b> | <b>2010<br/>-2018</b> | <b>2011<br/>-2019</b> | <b>2012<br/>-2020</b> | <b>2013<br/>-2021</b> | <b>2014<br/>-2022</b> | <b>2015<br/>-2023</b> |
|----------------------|-----------------------|-----------------------|-----------------------|-----------------------|-----------------------|-----------------------|-----------------------|-----------------------|-----------------------|-----------------------|-----------------------|-----------------------|-----------------------|-----------------------|-----------------------|
| All                  | 69.7%                 | 69.4%                 | 65.6%                 | 63.7%                 | 59.4%                 | 56.9%                 | 55.8%                 | 54.2%                 | 52.9%                 | 51.5%                 | 50.7%                 | 48.0%                 | 49.8%                 | 51.0%                 | 51.3%                 |
| 01 INFEC             | 76.2%                 | 73.9%                 | 64.8%                 | 59.1%                 | 51.0%                 | 48.0%                 | 48.4%                 | 46.5%                 | 43.0%                 | 40.7%                 | 42.5%                 | 39.6%                 | 47.5%                 | 46.7%                 | 44.3%                 |
| 02 CACER             | 67.8%                 | 67.8%                 | 65.0%                 | 64.3%                 | 59.8%                 | 56.2%                 | 53.4%                 | 51.8%                 | 49.8%                 | 46.4%                 | 44.2%                 | 40.0%                 | 40.2%                 | 40.0%                 | 39.1%                 |
| 03 BLOOD             | 92.9%                 | 93.8%                 | 81.0%                 | 82.6%                 | 75.9%                 | 64.9%                 | 70.3%                 | 61.5%                 | 63.0%                 | 55.8%                 | 58.2%                 | 62.5%                 | 57.4%                 | 64.8%                 | 76.4%                 |
| 04 IMMUN             | 70.0%                 | 85.0%                 | 73.9%                 | 61.8%                 | 56.8%                 | 58.5%                 | 58.2%                 | 57.6%                 | 64.9%                 | 62.5%                 | 55.8%                 | 57.1%                 | 66.0%                 | 67.2%                 | 69.8%                 |
| 05 METAB             | 69.4%                 | 68.1%                 | 57.5%                 | 48.6%                 | 47.3%                 | 46.1%                 | 43.9%                 | 42.4%                 | 42.5%                 | 43.5%                 | 44.9%                 | 44.4%                 | 50.3%                 | 52.6%                 | 55.9%                 |
| 06 NEURO             | 74.2%                 | 73.6%                 | 66.2%                 | 61.7%                 | 58.9%                 | 57.0%                 | 58.1%                 | 57.8%                 | 56.8%                 | 57.0%                 | 59.2%                 | 58.3%                 | 58.7%                 | 62.1%                 | 62.7%                 |
| 07 VISAL             | 73.9%                 | 71.4%                 | 62.9%                 | 66.7%                 | 68.0%                 | 69.5%                 | 68.9%                 | 73.7%                 | 70.7%                 | 74.0%                 | 68.8%                 | 62.0%                 | 62.5%                 | 61.0%                 | 59.0%                 |
| 08 CIRCU             | 66.7%                 | 58.3%                 | 60.0%                 | 67.4%                 | 62.5%                 | 64.1%                 | 67.1%                 | 66.7%                 | 70.7%                 | 71.8%                 | 70.7%                 | 67.9%                 | 65.8%                 | 65.9%                 | 63.4%                 |
| 09 RESPR             | 74.4%                 | 70.0%                 | 68.3%                 | 68.4%                 | 59.4%                 | 60.8%                 | 61.6%                 | 58.5%                 | 56.4%                 | 57.4%                 | 57.6%                 | 55.6%                 | 56.8%                 | 60.2%                 | 64.1%                 |

---

|          |       |       |       |       |       |       |       |       |       |       |       |       |       |       |       |
|----------|-------|-------|-------|-------|-------|-------|-------|-------|-------|-------|-------|-------|-------|-------|-------|
| 10 DIGST | 60.9% | 63.6% | 75.0% | 72.6% | 72.3% | 66.7% | 69.6% | 65.8% | 62.1% | 65.6% | 66.1% | 67.4% | 71.7% | 75.2% | 71.8% |
| 11 SKINS | 57.7% | 74.2% | 73.5% | 69.2% | 60.8% | 58.7% | 62.9% | 65.7% | 62.6% | 65.1% | 64.5% | 66.1% | 66.4% | 68.5% | 70.6% |
| 12 MUSKE | 83.3% | 68.3% | 68.8% | 66.7% | 61.9% | 58.3% | 62.5% | 58.5% | 58.0% | 56.7% | 57.6% | 61.6% | 68.2% | 62.6% | 65.1% |
| 13 GENIT | 91.7% | 92.9% | 82.4% | 73.9% | 75.0% | 76.5% | 79.4% | 75.8% | 69.7% | 78.1% | 75.9% | 66.7% | 77.4% | 75.8% | 70.6% |
| 14 OTHER | 56.3% | 50.0% | 57.7% | 58.3% | 64.7% | 65.2% | 59.2% | 55.4% | 59.3% | 62.1% | 68.6% | 65.4% | 65.5% | 69.9% | 75.0% |

---

**Supplementary Table S3.** The *phase 2 success rates* (P2SRs) for all CTPs and the CTPs of particular disease class (a total of 14 classes defined by WHO ICD-11) calculated across fifteen nine-year time-windows. All: all diseases; INFEC: Infectious/parasitic disease; CACER: Oncology; BLOOD: Blood/blood-forming organs disease; IMMUN: Immune system disease; METAB: Endocrine, nutritional or metabolic disease; NEURO: Neurology; VISAL: Visual system disease; CIRCU: Circulatory system disease; RESPR: Respiratory system disease; DIGST: Digestive system disease; SKINS: Skin disease; MUSKE: Musculoskeletal system/connective tissue disease; GENIT: Genitourinary and sexual related disease; OTHER: Other disease.

| <b>Disease Class</b> | <b>2001<br/>-2009</b> | <b>2002<br/>-2010</b> | <b>2003<br/>-2011</b> | <b>2004<br/>-2012</b> | <b>2005<br/>-2013</b> | <b>2006<br/>-2014</b> | <b>2007<br/>-2015</b> | <b>2008<br/>-2016</b> | <b>2009<br/>-2017</b> | <b>2010<br/>-2018</b> | <b>2011<br/>-2019</b> | <b>2012<br/>-2020</b> | <b>2013<br/>-2021</b> | <b>2014<br/>-2022</b> | <b>2015<br/>-2023</b> |
|----------------------|-----------------------|-----------------------|-----------------------|-----------------------|-----------------------|-----------------------|-----------------------|-----------------------|-----------------------|-----------------------|-----------------------|-----------------------|-----------------------|-----------------------|-----------------------|
| All                  | 35.8%                 | 32.8%                 | 31.1%                 | 28.3%                 | 26.3%                 | 24.2%                 | 24.1%                 | 23.3%                 | 23.2%                 | 23.1%                 | 23.8%                 | 22.2%                 | 23.6%                 | 25.1%                 | 26.0%                 |
| 01 INFEC             | 46.9%                 | 44.7%                 | 44.6%                 | 41.5%                 | 37.8%                 | 34.1%                 | 34.8%                 | 32.5%                 | 31.2%                 | 28.4%                 | 27.0%                 | 22.1%                 | 28.9%                 | 34.6%                 | 30.4%                 |
| 02 CACER             | 29.1%                 | 27.5%                 | 26.9%                 | 23.3%                 | 21.7%                 | 19.3%                 | 18.5%                 | 17.4%                 | 16.6%                 | 15.9%                 | 16.8%                 | 15.5%                 | 16.2%                 | 16.7%                 | 18.1%                 |
| 03 BLOOD             | 66.7%                 | 58.8%                 | 50.0%                 | 47.1%                 | 42.1%                 | 45.5%                 | 48.1%                 | 51.7%                 | 52.2%                 | 55.1%                 | 56.8%                 | 51.1%                 | 51.1%                 | 47.9%                 | 48.9%                 |
| 04 IMMUN             | 58.3%                 | 57.7%                 | 53.6%                 | 48.4%                 | 44.7%                 | 42.6%                 | 35.5%                 | 33.3%                 | 35.6%                 | 35.6%                 | 38.1%                 | 32.1%                 | 32.2%                 | 36.5%                 | 35.3%                 |
| 05 METAB             | 50.5%                 | 41.0%                 | 34.0%                 | 31.7%                 | 30.1%                 | 29.3%                 | 32.6%                 | 33.3%                 | 32.6%                 | 34.6%                 | 36.0%                 | 35.7%                 | 35.9%                 | 36.0%                 | 37.3%                 |
| 06 NEURO             | 33.7%                 | 30.9%                 | 28.6%                 | 25.9%                 | 24.1%                 | 22.7%                 | 22.9%                 | 24.9%                 | 24.9%                 | 24.9%                 | 25.7%                 | 25.4%                 | 25.2%                 | 27.5%                 | 28.3%                 |
| 07 VISAL             | 54.2%                 | 50.0%                 | 47.4%                 | 38.6%                 | 34.8%                 | 33.7%                 | 33.7%                 | 33.0%                 | 31.1%                 | 30.9%                 | 29.9%                 | 29.0%                 | 33.3%                 | 35.9%                 | 35.7%                 |
| 08 CIRCU             | 37.8%                 | 34.0%                 | 27.6%                 | 27.1%                 | 29.4%                 | 28.0%                 | 24.3%                 | 21.4%                 | 22.5%                 | 24.0%                 | 22.0%                 | 20.6%                 | 21.4%                 | 22.1%                 | 22.1%                 |
| 09 RESPR             | 29.2%                 | 25.8%                 | 26.1%                 | 24.3%                 | 23.8%                 | 20.9%                 | 20.3%                 | 19.9%                 | 19.4%                 | 20.0%                 | 19.6%                 | 17.6%                 | 22.2%                 | 24.2%                 | 23.4%                 |

---

|                 |       |       |       |       |       |       |       |       |       |       |       |       |       |       |       |
|-----------------|-------|-------|-------|-------|-------|-------|-------|-------|-------|-------|-------|-------|-------|-------|-------|
| <b>10 DIGST</b> | 38.5% | 34.4% | 33.8% | 30.9% | 27.9% | 24.4% | 24.1% | 19.7% | 22.8% | 26.1% | 26.6% | 24.8% | 26.0% | 28.9% | 28.8% |
| <b>11 SKINS</b> | 28.6% | 31.5% | 29.2% | 24.7% | 21.0% | 21.1% | 23.2% | 22.4% | 24.4% | 26.3% | 25.9% | 24.3% | 26.6% | 28.5% | 30.2% |
| <b>12 MUSKE</b> | 38.2% | 38.1% | 36.0% | 36.3% | 33.0% | 30.9% | 28.5% | 26.6% | 27.7% | 27.2% | 28.2% | 24.8% | 26.8% | 29.0% | 32.5% |
| <b>13 GENIT</b> | 39.3% | 30.6% | 28.2% | 29.4% | 28.8% | 29.2% | 26.1% | 29.0% | 30.0% | 27.9% | 31.0% | 30.2% | 25.3% | 25.9% | 29.9% |
| <b>14 OTHER</b> | 56.8% | 39.6% | 42.6% | 36.9% | 30.7% | 26.7% | 32.1% | 29.8% | 29.2% | 28.2% | 31.3% | 29.6% | 29.9% | 29.7% | 30.9% |

---

**Supplementary Table S4.** The *phase 3 success rates* (P3SRs) for all CTPs and the CTPs of particular disease class (a total of 14 classes defined by WHO ICD-11) calculated across fifteen nine-year time-windows. All: all diseases; INFEC: Infectious/parasitic disease; CACER: Oncology; BLOOD: Blood/blood-forming organs disease; IMMUN: Immune system disease; METAB: Endocrine, nutritional or metabolic disease; NEURO: Neurology; VISAL: Visual system disease; CIRCU: Circulatory system disease; RESPR: Respiratory system disease; DIGST: Digestive system disease; SKINS: Skin disease; MUSKE: Musculoskeletal system/connective tissue disease; GENIT: Genitourinary and sexual related disease; OTHER: Other disease.

| <b>Disease Class</b> | <b>2001<br/>-2009</b> | <b>2002<br/>-2010</b> | <b>2003<br/>-2011</b> | <b>2004<br/>-2012</b> | <b>2005<br/>-2013</b> | <b>2006<br/>-2014</b> | <b>2007<br/>-2015</b> | <b>2008<br/>-2016</b> | <b>2009<br/>-2017</b> | <b>2010<br/>-2018</b> | <b>2011<br/>-2019</b> | <b>2012<br/>-2020</b> | <b>2013<br/>-2021</b> | <b>2014<br/>-2022</b> | <b>2015<br/>-2023</b> |
|----------------------|-----------------------|-----------------------|-----------------------|-----------------------|-----------------------|-----------------------|-----------------------|-----------------------|-----------------------|-----------------------|-----------------------|-----------------------|-----------------------|-----------------------|-----------------------|
| All                  | 54.6%                 | 51.5%                 | 48.8%                 | 44.0%                 | 41.6%                 | 41.2%                 | 40.7%                 | 38.8%                 | 39.4%                 | 40.0%                 | 40.1%                 | 39.0%                 | 40.8%                 | 40.2%                 | 39.2%                 |
| 01 INFEC             | 60.7%                 | 60.7%                 | 55.7%                 | 50.0%                 | 41.8%                 | 45.7%                 | 46.8%                 | 44.6%                 | 41.0%                 | 42.1%                 | 38.2%                 | 36.3%                 | 37.4%                 | 31.1%                 | 22.8%                 |
| 02 CACER             | 40.9%                 | 38.2%                 | 38.6%                 | 37.5%                 | 39.3%                 | 37.5%                 | 39.8%                 | 41.1%                 | 45.2%                 | 49.3%                 | 49.8%                 | 51.3%                 | 53.0%                 | 54.0%                 | 55.1%                 |
| 03 BLOOD             | 85.7%                 | 85.7%                 | 87.5%                 | 88.9%                 | 90.0%                 | 82.4%                 | 66.7%                 | 62.5%                 | 66.7%                 | 63.9%                 | 63.6%                 | 61.7%                 | 60.4%                 | 55.6%                 | 46.0%                 |
| 04 IMMUN             | 58.3%                 | 66.7%                 | 57.1%                 | 62.5%                 | 52.6%                 | 46.2%                 | 41.4%                 | 32.1%                 | 32.3%                 | 33.3%                 | 30.0%                 | 28.0%                 | 37.5%                 | 38.5%                 | 40.7%                 |
| 05 METAB             | 62.8%                 | 59.2%                 | 57.5%                 | 59.6%                 | 52.9%                 | 54.1%                 | 52.1%                 | 49.3%                 | 53.2%                 | 54.3%                 | 52.3%                 | 49.5%                 | 50.5%                 | 47.9%                 | 45.7%                 |
| 06 NEURO             | 59.1%                 | 51.4%                 | 48.2%                 | 38.0%                 | 32.1%                 | 29.0%                 | 26.1%                 | 23.9%                 | 25.2%                 | 25.0%                 | 29.8%                 | 30.2%                 | 31.8%                 | 34.1%                 | 35.7%                 |
| 07 VISAL             | 50.0%                 | 50.0%                 | 53.3%                 | 55.6%                 | 47.6%                 | 45.5%                 | 34.4%                 | 34.4%                 | 37.1%                 | 28.6%                 | 25.0%                 | 21.7%                 | 23.1%                 | 28.3%                 | 31.0%                 |
| 08 CIRCU             | 50.0%                 | 47.2%                 | 44.4%                 | 35.1%                 | 33.9%                 | 36.9%                 | 43.6%                 | 40.9%                 | 36.1%                 | 32.5%                 | 31.4%                 | 28.8%                 | 31.3%                 | 26.2%                 | 20.4%                 |
| 09 RESPR             | 62.5%                 | 57.9%                 | 60.0%                 | 50.0%                 | 46.4%                 | 52.6%                 | 52.4%                 | 48.8%                 | 45.7%                 | 42.3%                 | 42.1%                 | 38.6%                 | 40.4%                 | 35.9%                 | 34.0%                 |

---

|                 |       |       |       |       |       |       |       |       |       |       |       |       |       |       |       |
|-----------------|-------|-------|-------|-------|-------|-------|-------|-------|-------|-------|-------|-------|-------|-------|-------|
| <b>10 DIGST</b> | 47.4% | 43.5% | 38.5% | 37.5% | 41.2% | 34.2% | 32.6% | 31.4% | 32.1% | 34.6% | 33.3% | 26.7% | 29.0% | 30.2% | 31.2% |
| <b>11 SKINS</b> | 58.8% | 55.0% | 42.1% | 27.8% | 25.0% | 36.0% | 41.4% | 36.4% | 37.8% | 40.9% | 40.0% | 43.1% | 47.2% | 49.2% | 52.6% |
| <b>12 MUSKE</b> | 87.0% | 81.5% | 75.9% | 66.7% | 65.6% | 62.5% | 55.9% | 55.9% | 48.6% | 47.1% | 48.7% | 44.7% | 40.0% | 43.1% | 44.0% |
| <b>13 GENIT</b> | 66.7% | 60.0% | 43.8% | 31.6% | 42.3% | 41.4% | 40.0% | 37.9% | 34.4% | 38.9% | 44.4% | 34.2% | 26.7% | 25.0% | 25.5% |
| <b>14 OTHER</b> | 47.4% | 54.6% | 58.3% | 46.4% | 43.3% | 39.4% | 36.1% | 25.7% | 22.0% | 16.0% | 12.0% | 16.2% | 20.8% | 18.7% | 18.9% |

---
